# Supplementary material for: Lifetime risk of being diagnosed with, or dying from, prostate cancer by major ethnic group in England 2008–2010
Source: Springer Nature journal article supplement (doi:10.1186/s12916-015-0405-5), 2015-07-29
Supplement: MOESM2 [file 12916_2015_405_MOESM2_ESM.xls]

## Sheet: Contents
Additional File 2 - Raw and manipulated dataset
Lifetime risk of being diagnosed with, or dying from, prostate cancer by major ethnic group in England 2008-2010
Therese Lloyd, Luke Hounsome, Anita Mehay, Sarah Mee, Julia Verne and Alison Cooper
		Note: this is a 'flat file' (no equations or calculations)
Key for tab name abbreviations
PCa	Prostate cancer
EST	Estimated
+	Contains manipulated data
All	All ethnic groups
Engl; England	England as a whole (no breakdown by ethnicity)
P&A	Prostate cancer and All cause (mortality)
i	Individual years
ONS	Data sourced from Office of National Statistics
PHE	Data sourced from Public Health England
Ethnicity groupings
White	includes White British, White Irish and Other White
Black	includes Black African, Black Caribbean and Other Black
Asian	includes Indian, Pakistani, Bangladeshi and Other Asian (NOT CHINESE)	Note: In the Census, Chinese is included under Asian. Here, Chinese has been re-coded under Other to be consistent with mid-year estimate data from ONS and PHE data.
Other	includes Chinese and Other
Methods
All White	Assuming that all deaths and incidences with unknown ethnicity belonged to the White ethnic group
Proportionate	Assuming that there is the same proportion of cases with a certain ethnicity in the unknown category as there are in the group with known ethnicity
Increased minority	Assuming that any missing ethnicity is more likely to be from a minority ethnic group (50% more than in the proportionate method)
Datasets
PHE	Using PHE data only
PHE/ONS	Using PHE data, but also including the deaths as reported in the ONS data
Contents
Rows highlighted in grey:	Data inputted into DevCan for lifetime risk calculations by major ethnic group
	TAB name	Title
	Population Engl 2008-2010 ONS+	Combined population data (person years) for England as a whole for 2008-2010. These are based on the ONS mid-year population estimates for 2008, 2009 and 2010. Note: these differ slightly from the experimental estimates by ethnic group, used in the ethnic group analyses.
	Population All 2008 ONS EST+	Experimental statistics on population by ethnic group 2008. The Population Estimates by Ethnic Group are experimental statistics, and have not been shown to meet the standards required of National Statistics
	Population All 2009 ONS EST+	Experimental statistics on population by ethnic group 2009. The Population Estimates by Ethnic Group are experimental statistics, and have not been shown to meet the standards required of National Statistics
	Population All 2011 Census+	Population by ethnic group from 2011 Census. Used as an approximation for the 2010 population.
	Population All 2008-2010+	Combined population data (person years) by ethnic group for 2008-2010.
	Incidence England 2008 ONS+	Number of new diagnoses of prostate cancer in 2008 in England, as reported by ONS (no breakdown by ethnic group)
	Incidence England 2009 ONS+	Number of new diagnoses of prostate cancer in 2009 in England, as reported by ONS (no breakdown by ethnic group)
	Incidence England 2010 ONS+	Number of new diagnoses of prostate cancer in 2010 in England, as reported by ONS (no breakdown by ethnic group)
	Incidence Engl 2008-2010 ONS+	Number of new diagnoses of prostate cancer for the combined period 2008-2010 in England, as reported by ONS (no breakdown by ethnic group)
	Incidence All 2008-2010 i PHE	Number of new diagoses of prostate cancer in years 2008, 2009, 2010 and 2011, as reported by PHE
	Incidence All 2008-2010 PHE+	Number of new diagnoses of prostate cancer for the combined period 2008-2010, as reported by PHE, PLUS data manipulation to account for the different methods and datasets
	P&A Mortality England 2008 ONS+	PCa and All cause mortality in 2008 in England, as reported by ONS (no breakdown by ethnic group)
	P&A Mortality England 2009 ONS+	PCa and All cause mortality in 2009 in England, as reported by ONS (no breakdown by ethnic group)
	P&A Mortality England 2010 ONS+	PCa and All cause mortality in 2010 in England, as reported by ONS (no breakdown by ethnic group)
	P&A Mort Engl 2008-2010 ONS+	PCa and All cause mortality for the combined period 2008-2010 in England, as reported by ONS (no breakdown by ethnic group)
	Mortality All 2008-2011 i PHE	All cause mortality in 2008, 2009, 2010, 2011 and 2008-2010 combined, by ethnic group, as recorded by PHE
	Mortality All 2008-2010 PHE+	All cause mortality for the combined period 2008-2010, as reported by PHE, PLUS data manipulation to account for the different methods and datasets
	PCa Mort 2008-2010 i PHE	Prostate cancer mortality in 2008, 2009, 2010, 2011 and 2008-2010 combined, by ethnic group, as recorded by PHE
	PCa Mort 2008-2010 PHE+	Prostate cancer mortality for the combined period 2008-2010, as reported by PHE, PLUS data manipulation to account for the different methods and datasets

## Sheet: Population Engl 2008-2010 ONS+
Mid-year population estimates for England, by year 2008, 2009 and 2010 and total person-years 2008-2010 (ONS)
ONS Crown Copyright Reserved [from Nomis on 24 February 2014]
http://www.nomisweb.co.uk/query/select/getdatasetbytheme.asp?theme=32
NOTE: THESE ARE NOT THE SAME EXPERIMENTAL ESTIMATES AS THOSE BROKEN DOWN BY ETHNIC GROUP USED FOR THE ANALYSES BY ETHNIC GROUP
NOTE: 2010 IS ALSO A MID-YEAR POPULATION ESTIMATE (IE NOT 2011 CENSUS DATA)
RAW DATA					CALCULATED DATA
area type	countries
area name	England
sex	Male
Age	2008	2009	2010		2008-2010		Correct Age groups	England, 2008-2010
Total	25434900	25633800	25877200		76945900
Aged under 1 year	341900	339100	344200		1025200		Total	76945900
Aged 1 - 4 years	1266400	1303600	1334900		3904900		0-4	4930100
Aged 5 - 9 years	1490400	1490400	1500400		4481200		5-9	4481200
Aged 10 - 14 years	1613000	1603000	1593100		4809100		10-14	4809100
Aged 15 - 19 years	1700500	1710700	1709200		5120400		15-19	5120400
Aged 20 - 24 years	1731100	1726500	1763500		5221100		20-24	5221100
Aged 25 - 29 years	1782200	1792600	1802800		5377600		25-29	5377600
Aged 30 - 34 years	1666300	1689800	1721700		5077800		30-34	5077800
Aged 35 - 39 years	1888500	1843800	1805600		5537900		35-39	5537900
Aged 40 - 44 years	1964000	1961100	1936700		5861800		40-44	5861800
Aged 45 - 49 years	1810600	1857100	1901400		5569100		45-49	5569100
Aged 50 - 54 years	1576500	1612500	1653800		4842800		50-54	4842800
Aged 55 - 59 years	1496100	1480300	1474000		4450400		55-59	4450400
Aged 60 - 64 years	1500800	1528800	1547600		4577200		60-64	4577200
Aged 65 - 69 years	1102400	1142100	1185200		3429700		65-69	3429700
Aged 70 - 74 years	939100	958400	969400		2866900		70-74	2866900
Aged 75 - 79 years	731700	738400	749600		2219700		75-79	2219700
Aged 80 - 84 years	486400	496100	509900		1492400		80-84	1492400
Aged 85 and over	346900	359500	374300		1080700		85+	1080700
							CHECK	76945900

## Sheet: Population All 2008 ONS EST+
Mid-year male population estimate in England by ethnic group and age, mid-2008 (experimental statistics) (ONS)
ONS, accessed 26/09/2013
http://www.ons.gov.uk/ons/taxonomy/index.html?nscl=Population+Estimates+by+Ethnic+Group#tab-data-tables
Note: Reliability of Estimates: The Population Estimates by Ethnic Group are experimental statistics, and have not been shown to meet the standards required of National Statistics
Subset of downloaded data																									Manipulated data
EE4: Estimated resident population by ethnic group, age and sex, mid-2008 (experimental statistics)																									Numbers in their entirety and correct age groups
Figures in thousands																									Correct Age groups	Asian	White	Other	Mixed	Black	CHECK
Age		All Groups	White: British	White: Irish	White: Other White	Mixed: White and Black Caribbean	Mixed: White and Black African	Mixed: White and Asian	Mixed: Other Mixed	Asian or Asian British: Indian	Asian or Asian British: Pakistani	Asian or Asian British: Bangladeshi	Asian or Asian British: Other Asian	Black or Black British: Black Caribbean	Black or Black British: Black African	Black or Black British: Other Black	Chinese or Other Ethnic Group: Chinese	Chinese or Other Ethnic Group: Other
ENGLAND
Males
	All ages	25323.5	21020.1	264.7	881.1	144.9	61	141.1	111.3	690.6	489.6	188.6	195.6	284.6	388	59.2	211.1	191.9							All ages	1.5644e+06	2.21659e+07	403000	458300	731800	2.53234e+07
	0	341.8	267.5	1.3	7.5	5	2.8	6.8	5.1	9.5	11.7	4.4	3.5	3.2	7.2	1.7	2.6	1.9							0-4	129100	1.3112e+06	20200	84500	57200	1.6022e+06
	1-4	1260.6	999.5	4.3	31.1	18.7	9	21.1	16	33.4	39.8	15.4	11.4	12.8	26.3	6	8.6	7.1							5-9	109100	1.2209e+06	16100	59700	50000	1.4558e+06
	5-9	1455.8	1180	4.1	36.8	21.2	7.7	17.7	13.1	36.6	43.8	17.9	10.8	15.6	28.4	6	7.8	8.3							10-14	107100	1334300	15900	53900	50700	1561900
	10-14	1561.9	1295.8	4.5	34	21.9	6.2	14.7	11.1	37.6	41.4	18.1	10	17.4	27.3	6	7.3	8.6							15-19	114600	1468500	24100	50800	54200	1712200
	15-19	1712.1	1417.4	5.6	45.5	21	5.4	13.8	10.6	45	41	16.4	12.2	19.6	28.7	5.9	12	12.1							20-24	160400	1.4866e+06	51300	47400	68300	1.814e+06
	20-24	1814	1388.5	9.2	88.9	17	5.5	13.9	11	70	50.6	20.9	18.9	22.3	40	6	26.9	24.4							25-29	178300	1399500	66500	36500	69800	1750600
	25-29	1750.4	1270.8	11.8	116.9	9.9	5.2	11.7	9.7	80.2	54.8	20.2	23.1	20.1	44.4	5.3	36.9	29.6							30-34	156100	1338200	54000	27700	60700	1636700
	30-34	1636.7	1213.2	14.4	110.6	6.5	4.3	9.1	7.8	70.4	46.6	17.7	21.4	16.6	40.1	4	29.2	24.8							35-39	142500	1594300	40300	25300	65500	1867900
	35-39	1867.8	1477.1	19.9	97.3	6.3	4	8.3	6.7	63.4	42.7	17	19.4	22.6	38.9	4	20	20.3							40-44	112400	1.7256e+06	34000	23300	76100	1.9714e+06
	40-44	1971.4	1619.2	24.2	82.2	6	3.6	7.6	6.1	54	30.3	11.9	16.2	32.5	38.3	5.3	16.6	17.4							45-49	89700	1600600	25500	16700	59300	1791800
	45-49	1791.7	1521.7	21.3	57.6	4.4	2.7	5.2	4.4	45.4	22	8.8	13.5	28.3	27.3	3.7	12.9	12.6							50-54	78200	1424700	18700	9900	35100	1566600
	50-54	1566.6	1360.8	20.5	43.4	2	1.8	3.3	2.8	41.9	19.4	6.2	10.7	17.5	15.9	1.7	10.2	8.5							55-59	59000	1.3874e+06	13400	6700	19800	1.4863e+06
	55-59	1486.1	1331.1	22.6	33.7	1.2	1.1	2.3	2.1	33.4	14.5	2.6	8.5	9.6	9.2	1	7	6.4							60-64	34800	1425700	8500	5000	13200	1487200
	60-64	1487.3	1373.2	24.7	27.8	0.9	0.6	1.8	1.7	20.6	6.9	1.6	5.7	7.1	5.4	0.7	4.4	4.1							65-69	34300	1037500	6200	3800	17400	1099200
	65-69	1099.2	992.1	23.7	21.7	0.8	0.4	1.4	1.2	18.1	8.6	3.4	4.2	12.2	4.5	0.7	3.4	2.8							70-74	29400	883500	4400	3100	16600	937000
	70-74	937.1	845.3	21.4	16.8	0.8	0.3	1.1	0.9	14.8	8	3.5	3.1	12.6	3.3	0.7	2.8	1.6							75-79	17500	700200	2500	2100	10500	732800
	75-79	732.9	672.9	15.7	11.6	0.6	0.2	0.8	0.5	9.3	4.5	1.9	1.8	8.5	1.6	0.4	1.6	0.9							80-84	7600	474500	1100	1200	4900	489300
	80-84	489.4	454.3	9.6	10.6	0.4	0.1	0.4	0.3	4.3	1.9	0.6	0.8	4	0.7	0.2	0.7	0.4							85+	4200	352500	600	900	2500	360700
	85-89	267.6	251.2	4.5	5.5	0.2	0	0.2	0.2	1.9	0.8	0.2	0.4	1.6	0.3	0.1	0.3	0.2							SUM	1564300	22165700	403300	458500	731800	25323600
	90+	93.2	88.4	1.4	1.5	0.1	0	0.1	0.1	0.6	0.2	0	0.1	0.4	0.1	0	0.1	0
Note: Figures may not add exactly due to rounding.
These estimates are "experimental" statistics and have not yet received formal National Statistics status. They should therefore be used with appropriate caution and awareness of their limitations.
Source: The table above can be cited as "Table EE4, Population Estimates by Ethnic Group Rel.8.0, Office for National Statistics, 2011"
Crown Copyright 2011

## Sheet: Population All 2009 ONS EST+
Mid-year male population estimate in England by ethnic group and age, mid-2009 (experimental statistics) (ONS)
ONS, accessed 26/09/2013
http://www.ons.gov.uk/ons/taxonomy/index.html?nscl=Population+Estimates+by+Ethnic+Group#tab-data-tables
Note: Reliability of Estimates: The Population Estimates by Ethnic Group are experimental statistics, and have not been shown to meet the standards required of National Statistics
Subset of downloaded data																									Manipulated data
EE4: Estimated resident population by ethnic group, age and sex, mid-2009 (experimental statistics)																									Numbers in their entirety and correct age groups
Figures in thousands																									Correct Age groups	Asian	White	Other	Mixed	Black	CHECK
Age		All Groups	White: British	White: Irish	White: Other White	Mixed: White and Black Caribbean	Mixed: White and Black African	Mixed: White and Asian	Mixed: Other Mixed	Asian or Asian British: Indian	Asian or Asian British: Pakistani	Asian or Asian British: Bangladeshi	Asian or Asian British: Other Asian	Black or Black British: Black Caribbean	Black or Black British: Black African	Black or Black British: Other Black	Chinese or Other Ethnic Group: Chinese	Chinese or Other Ethnic Group: Other
ENGLAND
Males
	All ages	25514.6	21065.2	262.3	906.4	149.4	64.7	149.4	117.7	714.6	507.9	196.3	205	286.5	403.8	61.1	221.2	202.9						25514.4	All ages	1623800	22233900	424100	481200	751400	25514400
	0	340.1	264.7	1.3	7.2	5	3	7.2	5.4	9.7	11.9	4.4	3.7	3.2	7.3	1.8	2.7	1.9							0-4	136000	1.3294e+06	21400	90600	59000	1.6364e+06
	1-4	1295.9	1020.5	4.6	31.1	19.2	9.9	23.3	17.6	35.3	42.3	16.2	12.5	12.8	27.6	6.3	9.4	7.4							5-9	110700	1222400	17000	62800	51100	1464000
	5-9	1464	1179.7	4.3	38.4	21.4	8.3	19	14.1	37.2	44.3	17.8	11.4	15.6	29.3	6.2	8.5	8.5							10-14	109200	1.3121e+06	16400	55000	51100	1.5438e+06
	10-14	1543.8	1272.2	4.4	35.5	21.8	6.5	15.3	11.4	37.9	42.5	18.5	10.3	17.1	28	6	7.5	8.9							15-19	114700	1.4566e+06	23600	51800	54400	1.7011e+06
	15-19	1700.9	1405.3	5.4	45.9	21.4	5.6	14	10.8	44.3	41.4	16.7	12.3	19.1	29.4	5.9	11.3	12.3							20-24	158500	1493400	49100	48900	67400	1817300
	20-24	1817.2	1399.3	8.7	85.4	17.9	5.6	14.2	11.2	68.9	49.6	21	19	22.1	39.2	6.1	25.2	23.9							25-29	187400	1418900	69700	39400	73500	1788900
	25-29	1788.9	1291	11.5	116.4	11.1	5.5	12.5	10.3	84.2	57	22	24.2	21.2	46.7	5.6	37.9	31.8							30-34	165600	1329200	59100	29500	63900	1647300
	30-34	1647.1	1200	13.7	115.5	6.9	4.6	9.7	8.3	75	49.7	18	22.9	17.1	42.5	4.3	32.3	26.8							35-39	146800	1.5382e+06	43400	25700	63100	1.8172e+06
	35-39	1817.1	1420.3	18.6	99.3	6.2	4.1	8.5	6.9	65.2	43.7	17.9	20	20.5	38.8	3.8	21.7	21.7							40-44	122300	1711800	36200	24300	75900	1970500
	40-44	1970.3	1600.4	23.8	87.6	6.2	3.8	8	6.3	57.7	34.2	13.1	17.3	31	39.9	5	17.7	18.5							45-49	93600	1634300	28000	18200	64300	1838400
	45-49	1838.6	1548.8	22.1	63.4	4.8	2.9	5.7	4.8	47.3	22.9	9.4	14	30.4	29.6	4.3	14.1	13.9							50-54	81700	1.4471e+06	20400	11100	40100	1.6004e+06
	50-54	1600.5	1380.2	20.2	46.7	2.4	2	3.6	3.1	43	20.2	7	11.5	19.6	18.4	2.1	11	9.4							55-59	63800	1360800	14400	7100	21700	1467800
	55-59	1467.9	1304.8	21.6	34.4	1.2	1.2	2.5	2.2	35.5	16.2	3.2	8.9	10.7	10	1	7.6	6.8							60-64	37800	1452800	9500	5400	13700	1519200
	60-64	1519.1	1398.6	24.4	29.8	1	0.7	1.9	1.8	22.7	7.4	1.5	6.2	6.8	6.1	0.8	4.9	4.6							65-69	33100	1.0729e+06	6500	3800	15900	1.1322e+06
	65-69	1132.3	1027	23.6	22.3	0.8	0.4	1.4	1.2	17.8	8	3	4.3	10.9	4.4	0.6	3.5	3							70-74	31100	900200	4900	3400	17300	956900
	70-74	956.6	861	21.5	17.7	0.8	0.4	1.2	1	15.6	8.4	3.7	3.4	12.8	3.8	0.7	3	1.9							75-79	19000	703800	2800	2200	11200	739000
	75-79	738.9	675.5	16.3	12	0.6	0.2	0.8	0.6	10.1	4.9	2	2	9	1.8	0.4	1.8	1							80-84	8400	483500	1200	1300	5500	499900
	80-84	499.8	463.4	10.1	10	0.4	0.1	0.5	0.3	4.7	2.1	0.7	0.9	4.5	0.8	0.2	0.8	0.4							85+	4600	366700	700	900	2700	375600
	85-89	273.1	256	4.7	5.9	0.2	0	0.2	0.2	2	0.8	0.2	0.4	1.7	0.3	0.1	0.3	0.2							SUM	1624300	22234100	424300	481400	751800	25515900
	90+	102.3	96.6	1.7	1.8	0.1	0	0.1	0.1	0.7	0.3	0.1	0.1	0.5	0.1	0	0.1	0.1
	CHECK (SUM)	2.55144e+07	21065300	262500	906300	149400	64800	149600	117600	714800	507800	196400	205300	286600	404000	61200	221300	203000	0	0	0	0	0	25515900
Note: Figures may not add exactly due to rounding.
These estimates are "experimental" statistics and have not yet received formal National Statistics status. They should therefore be used with appropriate caution and awareness of their limitations.
Source: The table above can be cited as "Table EE4, Population Estimates by Ethnic Group Rel.8.0, Office for National Statistics, 2011"
Crown Copyright 2011

## Sheet: Population All 2011 Census+
Male population in England by ethnic group and age, 2011 (Census data) - Used to estimate 2010 male population in England
http://www.nomisweb.co.uk/census/2011/DC2101EW
Raw data
DC2101EW - Ethnic group by sex by age
ONS Crown Copyright Reserved [from Nomis on 22 October 2013]
population	All usual residents
units	Persons
date	2011
area type	Countries
area name	England											Manipulated data: change to ethnic groupings													Manipulated data: correct age groups
sex	Males											Asian: Indian, Pakistani, Bangladeshi, Other Asian (NOT CHINESE); Other: Other + Chinese
																										Population by ethnicity (to use with datasets 1, 2 and 3)
Age	All categories: Ethnic group	White: Total	Mixed/multiple ethnic group: Total	Asian/Asian British: Indian	Asian/Asian British: Pakistani	Asian/Asian British: Bangladeshi	Asian/Asian British: Chinese	Asian/Asian British: Other Asian	Black/African/Caribbean/Black British: Total	Other ethnic group: Total		Asian	White	Other	Mixed	Black	CHECK								Correct Age groups	Asian	White	Other	Mixed	Black	CHECK
All categories: Age	26069148	22198066	595664	710301	569793	225251	179124	399335	888185	303429		1904680	22198066	482553	595664	888185	26069148								Total	1904680	22198066	482553	595664	888185	26069148
Age 0 to 4	1698171	1292142	109372	49939	65164	25059	9122	33644	88850	24879		173806	1292142	34001	109372	88850	1698171								0-4	173806	1292142	34001	109372	88850	1698171
Age 5 to 7	934518	719709	51729	25974	37052	15284	3775	18447	49223	13325		96757	719709	17100	51729	49223	934518								5-9	155997	1179140	26727	81017	78390	1521271
Age 8 to 9	586753	459431	29288	15377	23481	9836	2251	10546	29167	7376		59240	459431	9627	29288	29167	586753								10-14	139779	1269092	25180	70207	72753	1577011
Age 10 to 14	1577011	1269092	70207	38407	51512	22461	7175	27399	72753	18005		139779	1269092	25180	70207	72753	1577011								15-19	140605	1394163	36144	63907	71799	1706618
Age 15	335222	273342	13501	8043	9602	4367	2051	5701	15029	3586		27713	273342	5637	13501	15029	335222								20-24	172458	1449428	65740	55977	66801	1810404
Age 16 to 17	674651	551409	26094	15887	18818	7791	5375	12300	28913	8064		54796	551409	13439	26094	28913	674651								25-29	200439	1445485	58239	48259	68114	1820536
Age 18 to 19	696745	569412	24312	18488	19011	7782	8196	12815	27857	8872		58096	569412	17068	24312	27857	696745								30-34	203837	1384235	55032	38616	73183	1754903
Age 20 to 24	1810404	1449428	55977	63622	50845	21716	37603	36275	66801	28137		172458	1449428	65740	55977	66801	1810404								35-39	173974	1446605	44142	29864	70997	1765582
Age 25 to 29	1820536	1445485	48259	80753	58127	22438	22759	39121	68114	35480		200439	1445485	58239	48259	68114	1820536								40-44	135703	1645530	34223	28063	79922	1923441
Age 30 to 34	1754903	1384235	38616	80212	58334	22331	17545	42960	73183	37487		203837	1384235	55032	38616	73183	1754903								45-49	96305	1696591	28172	23688	75002	1919758
Age 35 to 39	1765582	1446605	29864	64234	45361	20183	13509	44196	70997	30633		173974	1446605	44142	29864	70997	1765582								50-54	86311	1514238	22892	15095	49193	1687729
Age 40 to 44	1923441	1645530	28063	50965	36822	14966	10476	32950	79922	23747		135703	1645530	34223	28063	79922	1923441								55-59	73326	1355076	17769	9148	26426	1481745
Age 45 to 49	1919758	1696591	23688	40925	22181	9083	9706	24116	75002	18466		96305	1696591	28172	23688	75002	1919758								60-64	46905	1476344	12574	6554	14763	1557140
Age 50 to 54	1687729	1514238	15095	40205	20599	7592	8776	17915	49193	14116		86311	1514238	22892	15095	49193	1687729								65-69	32704	1159172	7725	5283	13081	1217965
Age 55 to 59	1481745	1355076	9148	36932	18344	4336	6927	13714	26426	10842		73326	1355076	17769	9148	26426	1481745								70-74	33001	908229	6129	4098	16496	967953
Age 60 to 64	1557140	1476344	6554	25990	9321	1383	4927	10211	14763	7647		46905	1476344	12574	6554	14763	1557140								75-79	22632	713399	4113	3106	12453	755703
Age 65 to 69	1217965	1159172	5283	17403	6796	1904	2919	6601	13081	4806		32704	1159172	7725	5283	13081	1217965								80-84	11233	497416	2372	2027	6602	519650
Age 70 to 74	967953	908229	4098	16305	8487	3404	2717	4805	16496	3412		33001	908229	6129	4098	16496	967953								85+	5665	371781	1379	1383	3360	383568
Age 75 to 79	755703	713399	3106	11589	5779	2093	1864	3171	12453	2249		22632	713399	4113	3106	12453	755703								CHECK	1904680	22198066	482553	595664	888185	26069148
Age 80 to 84	519650	497416	2027	5812	2826	993	939	1602	6602	1433		11233	497416	2372	2027	6602	519650
Age 85 and over	383568	371781	1383	3239	1331	249	512	846	3360	867		5665	371781	1379	1383	3360	383568
												1904680	22198066	482553	595664	888185	26069148
In order to protect against disclosure of personal information, records have been swapped between different geographic areas. Some counts will be affected, particularly small counts at the lowest geographies.

## Sheet: Population All 2008-2010+
Estimated male population (person-years) 2008-2010 in England by ethnic group and age
Manipulated data
(Sum of population numbers for 2008, 2009,2011)
Data copied from Population All 2008 ONS EST+, Population All 2009 ONS EST+ and Population All 2011 Census+
																									Numbers to use:
Copied from Population All 2008 ONS EST+							Copied from Population All 2009 ONS EST+							Copied from Population All 2011 Census+											Population (person years) 2008-2010
Correct Age groups	Asian	White	Other	Mixed	Black	Total (person years)	Correct Age groups	Asian	White	Other	Mixed	Black	Total (person years)	Correct Age groups	Asian	White	Other	Mixed	Black	Total (person years)					Correct Age groups	Asian	White	Other	Mixed	Black	Total (person years)
All ages	1.5644e+06	2.21659e+07	403000	458300	731800	2.53234e+07	All ages	1623800	22233900	424100	481200	751400	25514400	Total	1904680	22198066	482553	595664	888185	26069148					Total	5092880	66597866	1309653	1535164	2371385	76906948
0-4	129100	1.3112e+06	20200	84500	57200	1.6022e+06	0-4	136000	1.3294e+06	21400	90600	59000	1.6364e+06	0-4	173806	1292142	34001	109372	88850	1698171					0-4	438906	3.93274e+06	75601	284472	205050	4936771
5-9	109100	1.2209e+06	16100	59700	50000	1.4558e+06	5-9	110700	1222400	17000	62800	51100	1464000	5-9	155997	1179140	26727	81017	78390	1521271					5-9	375797	3622440	59827	203517	179490	4441071
10-14	107100	1334300	15900	53900	50700	1561900	10-14	109200	1.3121e+06	16400	55000	51100	1.5438e+06	10-14	139779	1269092	25180	70207	72753	1577011					10-14	356079	3915492	57480	179107	174553	4682711
15-19	114600	1468500	24100	50800	54200	1712200	15-19	114700	1.4566e+06	23600	51800	54400	1.7011e+06	15-19	140605	1394163	36144	63907	71799	1706618					15-19	369905	4319263	83844	166507	180399	5119918
20-24	160400	1.4866e+06	51300	47400	68300	1.814e+06	20-24	158500	1493400	49100	48900	67400	1817300	20-24	172458	1449428	65740	55977	66801	1810404					20-24	491358	4429428	166140	152277	202501	5441704
25-29	178300	1399500	66500	36500	69800	1750600	25-29	187400	1418900	69700	39400	73500	1788900	25-29	200439	1445485	58239	48259	68114	1820536					25-29	566139	4263885	194439	124159	211414	5360036
30-34	156100	1338200	54000	27700	60700	1636700	30-34	165600	1329200	59100	29500	63900	1647300	30-34	203837	1384235	55032	38616	73183	1754903					30-34	525537	4051635	168132	95816	197783	5038903
35-39	142500	1594300	40300	25300	65500	1867900	35-39	146800	1.5382e+06	43400	25700	63100	1.8172e+06	35-39	173974	1446605	44142	29864	70997	1765582					35-39	463274	4579105	127842	80864	199597	5450682
40-44	112400	1.7256e+06	34000	23300	76100	1.9714e+06	40-44	122300	1711800	36200	24300	75900	1970500	40-44	135703	1645530	34223	28063	79922	1923441					40-44	370403	5082930	104423	75663	231922	5865341
45-49	89700	1600600	25500	16700	59300	1791800	45-49	93600	1634300	28000	18200	64300	1838400	45-49	96305	1696591	28172	23688	75002	1919758					45-49	279605	4931491	81672	58588	198602	5549958
50-54	78200	1424700	18700	9900	35100	1566600	50-54	81700	1.4471e+06	20400	11100	40100	1.6004e+06	50-54	86311	1514238	22892	15095	49193	1687729					50-54	246211	4386038	61992	36095	124393	4854729
55-59	59000	1.3874e+06	13400	6700	19800	1.4863e+06	55-59	63800	1360800	14400	7100	21700	1467800	55-59	73326	1355076	17769	9148	26426	1481745					55-59	196126	4103276	45569	22948	67926	4435845
60-64	34800	1425700	8500	5000	13200	1487200	60-64	37800	1452800	9500	5400	13700	1519200	60-64	46905	1476344	12574	6554	14763	1557140					60-64	119505	4354844	30574	16954	41663	4563540
65-69	34300	1037500	6200	3800	17400	1099200	65-69	33100	1.0729e+06	6500	3800	15900	1.1322e+06	65-69	32704	1159172	7725	5283	13081	1217965					65-69	100104	3269572	20425	12883	46381	3449365
70-74	29400	883500	4400	3100	16600	937000	70-74	31100	900200	4900	3400	17300	956900	70-74	33001	908229	6129	4098	16496	967953					70-74	93501	2691929	15429	10598	50396	2861853
75-79	17500	700200	2500	2100	10500	732800	75-79	19000	703800	2800	2200	11200	739000	75-79	22632	713399	4113	3106	12453	755703					75-79	59132	2117399	9413	7406	34153	2227503
80-84	7600	474500	1100	1200	4900	489300	80-84	8400	483500	1200	1300	5500	499900	80-84	11233	497416	2372	2027	6602	519650					80-84	27233	1455416	4672	4527	17002	1508850
85+	4200	352500	600	900	2500	360700	85+	4600	366700	700	900	2700	375600	85+	5665	371781	1379	1383	3360	383568					85+	14465	1090981	2679	3183	8560	1119868
SUM	1564300	22165700	403300	458500	731800	25323600	SUM	1624300	22234100	424300	481400	751800	25515900	CHECK	1904680	22198066	482553	595664	888185	26069148					CHECK	5093280	66597866	1310153	1535564	2371785	76908648
																															76908648

## Sheet: Incidence England 2008 ONS+
Prostate cancer incidence in England, 2008 (ONS)
(Data registered by September 2010 and released by ONS in December 2010)
http://www.ons.gov.uk/ons/rel/vsob1/cancer-statistics-registrations--england--series-mb1-/no--39--2008/cancer-statistics-registrations-tables--england--series-mb1---2008.zip
Data downloaded 04/11/2013
Table 1 Registrations of newly diagnosed cases of cancer (3rd digit): site, sex and age, 2008																						England – Registered by September 2010
ICD-10 code	Site description		All	Age group
			ages
				Under 1	1­4	5­9	10­14	15-19	20-24	25-29	30-34	35-39	40-44	45-49	50-54	55-59	60-64	65-69	70-74	75-79	80-84	85 and
																						over
C00-C97,	All registrations	M	194965	73	285	168	262	437	702	1060	1344	2176	3463	5235	8104	13963	23435	27144	31086	31578	24876	19574
D00-D48, 1		F	210234	53	192	160	214	376	2553	9733	7306	7567	8786	10345	12789	15330	21261	20952	21677	23666	21952	25322
C00-C97	All cancers	M	174003	54	261	149	215	369	594	895	1127	1854	3014	4593	7213	12457	20993	24383	27939	28278	22183	17432
		F	163158	40	174	132	171	242	549	1173	1842	3360	5702	8162	10449	13161	18530	18327	19067	20702	19228	22147
C00-C97	All cancers excluding nmsc 2	M	128103	54	259	144	206	346	554	807	931	1416	2207	3320	5397	9657	16122	18625	20679	20326	15329	11724
excl.C44		F	126706	40	172	129	165	227	499	1055	1540	2784	4712	6752	8680	10831	15016	14311	14456	15516	14229	15592
C00-C14	Malignant neoplasm of lip,	M	3525	1	1	2	3	4	14	21	24	58	150	279	421	546	543	464	350	309	191	144
	oral cavity and pharynx	F	1929	-	1	1	6	8	8	17	20	43	84	136	173	191	245	194	221	183	175	223
C00	Malignant neoplasm of lip	M	152	-	-	-	-	1	2	1	1	2	6	4	9	9	10	15	26	30	20	16
		F	100	-	-	-	-	-	-	1	-	2	4	3	4	4	5	6	14	12	16	29
C01	Malignant neoplasm of	M	324	-	-	-	-	-	-	-	-	5	6	34	48	63	46	43	40	29	7	3
	base of tongue	F	99	-	-	-	-	-	-	-	2	3	5	11	11	19	18	13	5	6	3	3
C02	Malignant neoplasm of	M	621	-	-	-	-	1	3	5	6	14	36	46	78	97	93	88	44	43	47	20
	other and unspecified	F	416	-	-	-	-	-	2	2	6	11	16	27	41	42	48	48	41	33	36	63
	parts of tongue
C03	Malignant neoplasm of gum	M	128	-	-	-	-	-	-	-	-	3	2	4	7	7	23	18	23	21	12	8
		F	134	-	-	-	-	-	1	1	-	-	3	3	7	5	12	13	20	19	26	24
C04	Malignant neoplasm of	M	239	-	-	-	-	-	-	2	1	1	14	19	31	45	44	32	22	15	7	6
	floor of mouth	F	125	-	-	-	-	-	-	-	-	-	2	10	15	20	22	22	6	11	7	10
C05	Malignant neoplasm of	M	174	-	-	-	-	1	1	-	1	6	4	15	21	27	26	20	14	19	9	10
	palate	F	153	-	-	-	-	-	-	1	1	3	6	10	19	18	21	14	27	15	10	8
C06	Malignant neoplasm of	M	274	-	-	-	-	-	-	2	-	7	7	16	32	33	46	36	28	37	18	12
	other and unspecified	F	219	-	-	1	-	-	-	3	2	7	7	14	7	19	28	18	35	22	27	29
	parts of mouth
C07	Malignant neoplasm of	M	247	-	-	-	-	-	4	2	8	7	6	7	19	23	21	25	29	45	21	30
	parotid gland	F	199	-	-	-	2	5	2	6	5	10	20	15	12	10	30	15	12	18	12	25
C08	Malignant neoplasm of	M	60	-	1	-	-	-	1	1	4	1	2	4	2	10	8	8	6	6	3	3
	other and unspecified	F	62	-	-	-	3	-	1	1	2	3	4	4	3	6	6	4	7	7	7	4
	major salivary glands
C09	Malignant neoplasm of	M	605	-	-	-	-	-	-	4	1	6	43	84	102	125	92	74	39	19	11	5
	tonsil	F	169	-	-	-	-	1	-	-	-	2	9	25	32	23	24	11	18	15	3	6
C10	Malignant neoplasm of	M	133	1	-	-	-	-	-	-	1	1	4	11	18	21	18	27	15	6	3	7
	oropharynx	F	51	-	-	-	-	-	-	1	1	-	3	-	3	9	9	7	7	2	5	4
C11	Malignant neoplasm of	M	131	-	-	2	3	1	3	4	-	2	8	17	14	19	22	11	8	11	1	5
	nasopharynx	F	57	-	1	-	1	2	2	1	-	2	3	8	5	5	6	4	8	5	2	2
C12	Malignant neoplasm of	M	173	-	-	-	-	-	-	-	-	-	6	5	21	28	33	29	24	11	9	7
	pyriform sinus	F	32	-	-	-	-	-	-	-	-	-	1	4	4	2	5	5	6	2	2	1
C13	Malignant neoplasm of	M	95	-	-	-	-	-	-	-	-	1	1	6	9	11	24	14	12	7	7	3
	hypopharynx	F	49	-	-	-	-	-	-	-	1	-	-	-	4	4	6	6	8	7	6	7
C14	Malignant neoplasm of	M	169	-	-	-	-	-	-	-	1	2	5	7	10	28	37	24	20	10	16	9
	other and ill-defined	F	64	-	-	-	-	-	-	-	-	-	1	2	6	5	5	8	7	9	13	8
	sites in the lip, oral
	cavity and pharynx
C15	Malignant neoplasm of	M	4486	-	-	-	-	1	-	-	11	17	57	113	218	473	641	660	689	680	524	402
	oesophagus	F	2207	-	-	-	-	1	1	1	3	9	24	38	73	141	198	216	294	351	381	476
C16	Malignant neoplasm of	M	3951	-	-	-	-	-	6	10	13	25	36	95	149	224	365	463	662	770	659	474
	stomach	F	2134	-	-	-	1	2	1	7	10	11	41	44	61	92	126	214	288	363	396	477
C17	Malignant neoplasm of	M	469	-	-	-	-	-	-	1	2	7	12	28	32	50	63	68	71	61	37	37
	small intestine	F	420	-	-	-	-	-	-	2	-	7	9	22	27	28	42	59	63	66	55	40
C18-C20	Malignant neoplasm of colon	M	17732	1	-	-	4	6	20	60	47	127	223	371	680	1172	2360	2812	2881	2951	2322	1695
	and rectum	F	14114	-	-	-	2	6	16	30	59	87	185	328	560	858	1499	1668	1910	2263	2247	2396
C18	Malignant neoplasm of	M	10900	1	-	-	4	5	15	36	30	66	136	208	365	608	1337	1656	1768	1962	1535	1168
	colon	F	9931	-	-	-	2	6	11	24	39	49	111	184	337	535	1014	1160	1349	1674	1670	1766
C19	Malignant neoplasm of	M	1350	-	-	-	-	-	1	6	4	15	17	28	50	104	193	227	215	217	168	105
	rectosigmoid junction	F	992	-	-	-	-	-	1	-	5	4	18	35	47	79	119	122	123	140	156	143
C20	Malignant neoplasm of	M	5482	-	-	-	-	1	4	18	13	46	70	135	265	460	830	929	898	772	619	422
	rectum	F	3191	-	-	-	-	-	4	6	15	34	56	109	176	244	366	386	438	449	421	487
C21	Malignant neoplasm of	M	308	-	-	-	-	-	1	-	2	7	19	19	25	33	48	35	46	35	20	18
	anus and anal canal	F	490	-	-	-	-	-	-	-	5	8	15	37	45	51	63	53	66	53	54	40
C22	Malignant neoplasm of liver	M	1865	4	5	1	1	-	1	12	12	14	29	70	74	158	217	261	313	298	224	171
	and intrahepatic bile ducts	F	1074	3	1	-	1	5	2	1	7	12	20	26	34	62	95	109	137	184	173	202
C23	Malignant neoplasm of	M	175	-	-	-	-	-	-	-	-	1	2	2	6	14	22	23	28	30	27	20
	gallbladder	F	380	-	-	-	-	-	-	-	1	2	6	5	12	27	34	53	58	58	68	56
C24	Malignant neoplasm of	M	421	-	-	-	-	-	-	-	1	5	4	12	22	39	57	56	63	74	53	35
	other and unspecified	F	350	-	1	-	-	-	-	1	-	2	3	7	12	34	43	36	51	50	42	68
	parts of biliary tract
C25	Malignant neoplasm of	M	3345	-	-	-	-	1	-	4	8	13	42	81	144	274	414	466	530	541	475	352
	pancreas	F	3410	-	-	1	-	3	3	1	5	12	23	61	86	188	324	379	493	584	579	668
C26	Malignant neoplasm of	M	298	-	-	-	-	-	-	-	1	2	3	7	14	10	28	25	36	46	58	68
	other and ill-defined	F	335	-	-	-	-	-	1	1	1	1	4	5	8	6	8	19	28	49	73	131
	digestive organs
C30	Malignant neoplasm of	M	144	-	1	-	1	-	-	-	-	5	8	6	14	9	14	18	22	20	16	10
	nasal cavity and middle ear	F	97	-	-	-	-	1	2	1	3	1	4	10	4	6	13	14	5	10	11	12
C31	Malignant neoplasm of	M	82	-	-	-	1	1	-	-	-	1	4	3	10	9	14	9	17	6	5	2
	accessory sinuses	F	43	-	-	-	-	-	1	-	1	2	-	2	1	7	8	5	3	4	2	7
C32	Malignant neoplasm of	M	1492	-	-	-	-	1	2	1	2	8	16	71	113	162	274	226	224	177	117	98
	larynx	F	306	-	-	-	-	-	-	-	1	9	9	7	28	29	56	38	42	28	34	25
C33-C34	Malignant neoplasm of	M	18399	-	1	-	3	2	3	4	25	36	120	267	617	1223	2116	2758	3263	3327	2641	1993
	trachea, bronchus and lung	F	14147	-	-	-	1	2	6	6	15	43	98	286	549	983	1709	1871	2172	2513	2143	1750
C33	Malignant neoplasm of	M	17	-	-	-	-	-	-	-	-	-	-	-	-	1	5	2	7	2	-	-
	trachea	F	16	-	-	-	1	-	-	-	-	1	1	-	-	-	2	2	3	3	2	1
C34	Malignant neoplasm of	M	18382	-	1	-	3	2	3	4	25	36	120	267	617	1222	2111	2756	3256	3325	2641	1993
	bronchus and lung	F	14131	-	-	-	-	2	6	6	15	42	97	286	549	983	1707	1869	2169	2510	2141	1749
C37	Malignant neoplasm of	M	60	-	1	-	-	-	-	-	2	2	3	3	1	6	9	15	10	4	2	2
	thymus	F	44	-	-	-	-	-	-	1	3	-	-	2	3	10	3	5	7	4	-	6
C38	Malignant neoplasm of	M	120	1	-	-	1	2	2	5	1	1	4	6	6	7	7	12	22	17	11	15
	heart, mediastinum and	F	82	1	2	-	-	-	-	1	-	-	2	3	4	10	11	5	11	6	12	14
	pleura
C39	Malignant neoplasm of other	M	8	-	-	-	-	-	-	-	-	-	-	1	-	-	1	1	1	1	3	-
	and ill-defined sites in	F	6	-	-	-	-	-	-	-	-	-	-	-	-	-	1	1	2	-	2	-
	the respiratory system and
	intrathoracic organs
C40	Malignant neoplasm of	M	142	-	-	7	20	24	10	7	4	6	11	8	7	4	8	8	7	6	3	2
	bone and articular	F	121	-	3	11	17	12	6	6	4	6	6	6	9	4	6	6	4	4	4	7
	cartilage of limbs
C41	Malignant neoplasm of bone	M	147	1	1	3	8	7	9	8	6	9	6	6	7	15	16	12	11	10	7	5
	and articular cartilage of	F	105	-	2	2	6	7	3	5	4	3	3	7	8	8	5	10	11	11	6	4
	other and unspecified sites
C43	Malignant melanoma of skin	M	4622	-	-	-	1	19	40	86	104	203	285	270	320	408	583	585	576	475	379	288
		F	5073	-	-	2	2	21	90	156	200	338	439	416	399	436	567	447	449	388	344	379
C44 3	Other malignant neoplasms	M	45900	-	2	5	9	23	40	88	196	438	807	1273	1816	2800	4871	5758	7260	7952	6854	5708
	of skin	F	36452	-	2	3	6	15	50	118	302	576	990	1410	1769	2330	3514	4016	4611	5186	4999	6555
C45	Mesothelioma	M	1672	-	-	-	-	1	-	-	3	1	8	11	33	97	205	293	329	319	241	131
		F	376	-	-	-	-	-	-	-	2	2	3	6	13	26	49	50	56	56	57	56
C46	Kaposi's sarcoma	M	131	-	-	-	-	-	-	7	10	29	20	14	11	8	8	6	5	4	6	3
		F	27	-	-	-	-	-	4	1	5	7	3	2	1	1	1	-	-	2	-	-
C47	Malignant neoplasm of	M	48	2	2	-	1	2	1	1	3	2	6	5	4	1	2	3	3	3	5	2
	peripheral nerves and	F	45	2	4	2	-	4	1	2	1	2	2	3	6	1	4	3	1	1	5	1
	autonomic nervous system
C48	Malignant neoplasm of	M	140	1	1	-	1	1	2	-	-	1	9	4	3	14	16	13	23	20	21	10
	retroperitoneum and	F	450	1	1	-	-	-	1	1	2	5	9	19	30	36	86	68	69	68	33	21
	peritoneum
C49	Malignant neoplasm of other	M	721	1	5	3	11	15	16	16	22	35	34	41	47	50	96	71	78	74	54	52
	connective and soft tissue	F	520	4	7	2	10	6	12	17	12	31	29	35	38	44	50	51	39	41	45	47
C50	Malignant neoplasm of	M	291	-	-	-	-	-	1	-	2	2	14	7	18	29	37	36	44	37	45	19
	breast	F	39681	-	-	-	-	1	24	149	415	1112	2365	3604	4340	4396	5575	4658	3346	3422	2896	3378
C51	Malignant neoplasm of	F	973	-	-	-	-	-	2	2	10	18	32	57	57	60	74	94	103	122	129	213
	vulva
C52	Malignant neoplasm of	F	194	2	1	-	-	-	-	2	-	4	6	10	10	20	28	20	21	20	25	25
	vagina
C53	Malignant neoplasm of	F	2334	-	-	-	-	1	39	274	301	322	279	186	137	134	136	101	101	117	110	96
	cervix uteri
C54	Malignant neoplasm of	F	6077	-	-	-	-	-	2	7	21	55	133	228	441	834	1096	886	871	669	448	386
	corpus uteri
C55	Malignant neoplasm of	F	274	-	-	-	-	-	-	1	4	4	17	12	19	31	32	22	24	31	33	44
	uterus, part unspecified
C56-C57	Malignant neoplasm of ovary	F	5304	-	-	-	15	28	45	69	68	115	207	331	390	516	663	630	665	595	490	477
	and other and unspecified
	female genital organs
C56	Malignant neoplasm of ovary	F	5092	-	-	-	15	28	45	69	65	114	202	324	376	491	638	591	640	567	470	457
C57	Malignant neoplasm of other	F	212	-	-	-	-	-	-	-	3	1	5	7	14	25	25	39	25	28	20	20
	and unspecified female
	genital organs
C58	Malignant neoplasm of	F	8	-	-	-	-	-	2	-	2	-	2	1	-	-	1	-	-	-	-	-
	placenta
C60	Malignant neoplasm of	M	384	-	1	-	-	-	-	2	1	10	6	24	23	37	54	44	51	52	48	31
	penis
C61	Malignant neoplasm of	M	30893	-	1	-	1	-	1	-	1	5	53	222	809	2273	4522	5578	5937	5492	3423	2575
	prostate
C62	Malignant neoplasm of	M	1764	2	6	-	3	57	181	297	270	274	256	181	86	63	23	24	18	9	5	9
	testis
C63	Malignant neoplasm of	M	61	-	-	-	-	-	-	-	1	2	1	3	5	5	10	5	9	11	4	5
	other and unspecified male
	genital organs
C64	Malignant neoplasm of	M	3738	3	24	8	3	1	6	9	20	57	115	174	243	383	519	479	576	508	339	271
	kidney, except renal pelvis	F	2353	6	21	9	2	2	2	8	13	43	67	94	130	252	253	283	305	318	291	254
C65	Malignant neoplasm of renal	M	265	-	-	-	-	-	-	-	-	-	5	4	11	23	27	42	37	46	46	24
	pelvis	F	191	-	-	-	-	-	-	-	-	-	2	3	5	9	16	27	34	42	29	24
C66	Malignant neoplasm of	M	255	-	-	-	-	-	-	-	1	-	2	5	11	18	20	32	39	58	44	25
	ureter	F	128	-	-	-	-	-	-	-	-	-	1	1	4	5	13	9	13	32	29	21
C67	Malignant neoplasm of	M	6322	-	1	1	-	1	3	2	8	20	40	83	161	329	629	855	1056	1159	1046	928
	bladder	F	2469	2	-	1	-	-	1	1	5	10	24	33	63	102	182	239	304	428	462	612
C68	Malignant neoplasm of	M	112	-	-	1	-	-	-	-	-	-	1	1	6	4	20	16	16	18	15	14
	other and unspecified	F	36	-	-	-	-	-	1	-	-	-	2	1	-	5	4	-	2	7	6	8
	urinary organs
C69	Malignant neoplasm of eye	M	180	10	15	1	3	1	-	3	2	8	6	8	12	23	22	12	17	18	10	9
	and adnexa	F	137	7	9	1	2	1	-	1	3	5	7	5	11	10	18	11	14	15	8	9
C70	Malignant neoplasm of	M	28	-	-	-	-	-	1	1	-	1	3	-	-	1	1	2	4	6	3	5
	meninges	F	51	-	1	-	1	-	-	-	-	3	2	1	3	4	4	6	6	4	7	9
C71	Malignant neoplasm of brain	M	2179	8	35	30	29	33	39	47	58	76	105	128	163	203	308	252	251	216	127	71
		F	1602	2	28	35	29	17	26	31	38	54	63	86	109	138	179	157	205	150	138	117
C72	Malignant neoplasm of	M	58	-	8	3	2	1	2	2	2	2	3	4	4	6	5	8	3	1	1	1
	spinal cord, cranial nerves	F	57	-	5	5	2	3	2	4	4	3	4	6	3	2	6	1	1	4	-	2
	and other parts of central
	nervous system
C73	Malignant neoplasm of	M	466	-	1	-	2	5	12	16	29	42	38	38	38	47	56	32	31	35	21	23
	thyroid gland	F	1372	-	-	3	4	17	55	85	107	144	155	134	135	102	96	85	81	60	53	56
C74	Malignant neoplasm of	M	74	9	8	1	4	2	3	1	1	4	3	1	6	3	6	4	5	6	3	4
	adrenal gland	F	72	3	8	2	-	-	-	3	-	3	5	8	7	2	5	7	5	3	8	3
C75	Malignant neoplasm of	M	60	-	-	1	4	7	5	2	1	-	5	2	1	7	5	3	6	4	5	2
	other endocrine glands	F	54	-	-	1	1	2	-	-	4	1	2	3	1	2	3	7	12	8	2	5
	and related structures
C76	Malignant neoplasm of other	M	169	2	5	1	1	-	5	2	1	5	5	8	10	11	14	14	22	30	14	19
	and ill-defined sites	F	306	2	3	2	1	-	2	1	3	6	4	7	9	14	25	16	30	38	46	97
C77	Secondary and unspecified	M	418	-	1	1	-	1	5	2	1	7	19	27	55	57	63	45	47	28	31	28
	malignant neoplasm of	F	377	-	-	-	1	-	1	3	8	9	9	19	25	36	48	50	39	44	36	49
	lymph nodes
C78	Secondary malignant	M	1168	-	-	-	-	3	3	3	3	9	11	27	44	70	85	127	173	209	206	195
	neoplasm of respiratory	F	1547	1	-	-	-	-	2	5	3	8	19	31	41	73	128	159	182	239	280	376
	and digestive organs
C79	Secondary malignant	M	503	-	-	-	-	1	2	2	4	3	4	11	22	31	56	60	78	70	87	72
	neoplasm of other sites	F	490	-	-	-	-	-	1	-	4	5	6	11	12	25	43	49	63	73	96	102
C80	Malignant neoplasm without	M	2113	-	-	2	1	6	2	9	9	14	22	44	80	118	187	203	296	387	361	372
	specification of site	F	2550	-	-	-	-	-	4	6	7	14	19	54	60	100	177	187	279	395	465	783
C81	Hodgkin's disease	M	786	-	5	11	17	50	71	72	70	62	65	59	44	44	46	46	52	45	19	8
		F	641	-	-	1	22	46	80	66	65	56	40	31	29	29	27	33	48	25	22	21
C82-C85	Non-Hodgkin's lymphoma	M	5186	-	11	18	39	36	41	50	75	125	199	271	327	447	617	613	740	674	540	363
		F	4490	-	6	7	4	9	25	39	52	84	123	144	251	380	518	542	629	622	535	520
C82	Follicular [nodular]	M	827	-	-	-	3	1	2	8	17	25	50	72	68	103	105	104	101	81	52	35
	non-Hodgkins's lymphoma	F	930	-	-	-	-	-	1	5	9	19	40	49	80	118	148	131	121	97	65	47
C83	Diffuse non-Hodgkin's	M	2705	-	8	15	26	24	24	21	33	59	95	132	163	219	318	336	390	385	275	182
	lymphoma	F	2118	-	5	3	3	8	19	24	26	37	49	51	104	152	213	243	333	339	270	239
C84	Peripheral and cutaneous	M	387	-	1	1	1	3	2	6	9	17	15	21	26	27	54	45	63	43	39	14
	T-cell lymphomas	F	215	-	-	2	-	1	-	2	7	8	8	12	8	15	32	21	22	21	24	32
C85	Other and unspecified types	M	1267	-	2	2	9	8	13	15	16	24	39	46	70	98	140	128	186	165	174	132
	of non-Hodgkin's lymphoma	F	1227	-	1	2	1	-	5	8	10	20	26	32	59	95	125	147	153	165	176	202
C88	Malignant	M	126	-	-	-	-	1	-	-	-	-	-	1	1	6	15	15	14	26	27	20
	immunoproliferative	F	69	-	1	-	-	-	-	-	-	-	-	3	-	3	8	10	11	10	10	13
	diseases
C90	Multiple myeloma and	M	2089	-	-	-	-	-	1	1	6	13	28	60	91	163	254	275	322	373	292	210
	malignant plasma cell	F	1716	-	-	-	-	2	-	3	4	11	20	56	85	107	187	185	270	278	236	272
	neoplasms
C91-C95	Leukaemia	M	3770	7	117	48	41	53	42	41	59	57	86	129	146	242	382	431	554	531	438	366
		F	2710	3	67	41	35	20	24	35	30	50	70	74	114	157	212	248	297	379	377	477
C91	Lymphoid leukaemia	M	2020	5	97	39	31	28	12	14	16	24	35	61	80	138	227	240	290	294	212	177
		F	1293	1	56	37	22	11	11	9	5	14	19	24	44	72	102	140	149	207	145	225
C92	Myeloid leukaemia	M	1615	2	16	9	8	21	28	26	40	32	48	64	61	99	143	176	246	218	208	170
		F	1288	1	6	4	13	8	12	26	24	34	47	46	65	84	101	97	138	155	211	216
C93	Monocytic leukaemia	M	24	-	1	-	-	-	-	-	2	-	-	1	1	1	2	7	1	2	4	2
		F	20	-	-	-	-	-	-	-	1	1	2	1	-	-	1	1	2	3	2	6
C94	Other leukaemias of	M	9	-	3	-	-	-	-	-	-	-	-	-	-	-	-	-	1	3	-	2
	specified cell type	F	11	-	-	-	-	-	-	-	-	-	-	1	-	-	1	3	-	-	3	3
C95	Leukaemia of unspecified	M	102	-	-	-	2	4	2	1	1	1	3	3	4	4	10	8	16	14	14	15
	cell type	F	98	1	5	-	-	1	1	-	-	1	2	2	5	1	7	7	8	14	16	27
C96 4	Other and unspecified	M	142	1	2	1	-	-	1	-	3	3	1	5	2	8	12	9	21	19	28	26
	malignant neoplasms of	F	158	1	-	-	-	-	1	2	5	2	6	5	5	4	13	15	15	26	21	37
	lymphoid, haematopoietic
	and related tissue
C97	Malignant neoplasms of	M	-	-	-	-	-	-	-	-	-	-	-	-	-	-	-	-	-	-	-	-
	independent (primary)	F	-	-	-	-	-	-	-	-	-	-	-	-	-	-	-	-	-	-	-	-
	multiple sites
D00	Carcinoma in situ of oral	M	318	-	-	-	-	-	-	-	-	4	3	6	19	39	49	46	44	39	32	37
	cavity,oesophagus and	F	159	-	-	1	-	-	-	-	-	2	2	7	9	8	14	19	24	22	16	35
	stomach
D01	Carcinoma in situ of other	M	1096	-	-	-	-	-	3	2	4	15	15	24	47	88	160	213	172	157	132	64
	and unspecified digestive	F	846	-	-	-	-	-	1	3	4	14	21	33	28	77	94	140	120	119	96	96
	organs
D02	Carcinoma in situ of middle	M	212	-	-	-	-	-	-	-	2	2	3	3	4	25	38	24	41	37	23	10
	ear and respiratory system	F	68	-	-	-	-	-	-	-	-	2	1	2	9	2	7	9	11	9	7	9
D03	Melanoma in situ	M	1718	-	-	-	-	9	13	28	35	52	63	80	96	145	215	220	242	241	167	112
		F	1944	-	-	1	2	8	31	41	66	101	132	121	144	165	224	208	212	219	137	132
D04	Carcinoma in situ of skin	M	4442	-	-	-	-	1	1	7	11	24	33	74	125	209	397	487	685	887	792	709
		F	7030	-	-	1	-	1	-	4	10	31	56	106	142	256	467	673	998	1323	1356	1606
D05	Carcinoma in situ of breast	M	12	-	-	-	-	-	-	-	-	-	1	3	-	2	2	-	2	1	-	1
		F	4795	-	-	-	-	-	4	12	21	109	256	369	941	747	879	706	314	206	137	94
D06	Carcinoma in situ of	F	23023	-	-	-	-	36	1842	8280	5134	3585	2129	1036	466	245	167	46	26	14	6	11
	cervix uteri
D07	Carcinoma in situ of other	M	1070	-	-	-	-	-	6	8	17	12	19	14	40	135	195	242	189	114	54	25
	and unspecified genital	F	671	-	-	-	-	3	15	36	41	79	97	82	76	60	64	35	27	23	18	15
	organs
D09	Carcinoma in situ of other	M	2192	-	-	-	-	1	2	1	6	12	23	38	67	136	274	290	384	417	315	226
	and unspecified sites	F	602	-	-	-	-	-	2	1	3	5	8	9	21	33	65	78	90	105	98	84
D32	Benign neoplasm of meninges	M	391	1	1	-	2	2	4	5	17	10	22	23	24	32	52	45	35	40	40	36
		F	960	-	1	1	-	-	4	9	13	43	63	70	93	104	102	80	76	83	78	140
D33	Benign neoplasm of brain	M	271	2	4	1	5	5	7	17	18	17	30	26	28	27	27	24	11	11	3	8
	and other parts of central	F	287	1	2	1	2	2	3	17	18	14	36	18	31	34	30	23	16	22	8	9
	nervous system
D35.2	Benign neoplasm of	M	358	-	-	-	5	2	1	8	17	21	32	30	38	45	45	40	34	20	15	5
	pituitary gland	F	316	-	-	1	-	11	12	19	24	23	32	33	28	35	26	24	15	20	9	4
D35.3	Benign neoplasm of	M	-	-	-	-	-	-	-	-	-	-	-	-	-	-	-	-	-	-	-	-
	craniopharyngeal duct	F	1	-	-	-	-	-	-	-	-	-	-	-	-	-	-	-	1	-	-	-
D35.4	Benign neoplasm of	M	-	-	-	-	-	-	-	-	-	-	-	-	-	-	-	-	-	-	-	-
	pineal gland	F	1	-	-	-	-	-	-	-	-	1	-	-	-	-	-	-	-	-	-	-
D37	Neoplasm of uncertain or	M	943	2	-	5	5	14	11	18	6	16	22	43	45	65	116	183	129	120	81	62
	unknown behaviour of oral	F	898	1	-	1	10	21	26	12	19	21	33	38	33	64	94	96	114	119	95	101
	cavity and digestive organs
D38	Neoplasm of uncertain or	M	80	2	-	-	-	-	1	2	-	5	-	3	5	7	10	11	8	14	8	4
	unknown behaviour of middle	F	102	-	-	1	1	-	1	2	3	5	2	2	9	5	13	15	8	14	14	7
	ear and respiratory and
	intrathoracic organs
D39	Neoplasm of uncertain or	F	617	1	-	3	4	11	24	48	24	68	60	59	56	54	48	39	33	32	30	23
	unknown behaviour of female
	genital organs
D40	Neoplasm of uncertain or	M	76	2	2	-	-	3	3	5	6	7	10	3	4	2	3	6	11	3	3	3
	unknown behaviour of male
	genital organs
D41	Neoplasm of uncertain or	M	3935	1	-	1	1	1	7	5	21	30	48	109	154	300	498	556	706	680	490	327
	unknown behaviour of	F	1406	-	-	-	-	3	1	7	4	11	19	49	54	100	180	180	218	221	195	164
	urinary organs
D42	Neoplasm of uncertain or	M	55	-	-	-	1	-	1	-	2	1	3	4	3	8	10	4	7	8	3	-
	unknown behaviour of	F	85	-	-	-	-	1	-	2	3	3	4	10	9	10	7	15	7	8	3	3
	meninges
D43	Neoplasm of uncertain or	M	270	4	6	6	9	8	7	11	5	11	10	12	15	14	21	14	29	32	23	33
	unknown behaviour of brain	F	256	2	6	8	7	8	13	6	10	5	9	12	11	9	10	10	14	32	33	51
	and central nervous system
D44	Neoplasm of uncertain or	M	104	1	2	2	6	2	3	5	7	4	5	10	4	8	9	11	5	12	7	1
	unknown behaviour of	F	140	-	-	2	4	4	2	6	4	5	12	9	21	14	14	10	14	6	7	6
	endocrine glands
D45	Polycythaemia vera	M	773	-	-	-	-	2	6	9	18	29	52	69	70	80	109	93	84	75	53	24
		F	391	-	-	-	-	2	2	1	5	11	8	17	27	39	45	32	53	59	47	43
D46	Myelodysplastic syndromes	M	1116	-	1	1	-	-	5	3	3	6	5	10	19	35	54	108	133	190	253	290
		F	895	1	-	2	-	1	3	3	7	8	10	10	18	21	50	52	80	130	172	327
D47	Other neoplasms of uncertain	M	965	1	-	1	1	2	5	7	6	14	26	33	52	75	116	106	141	139	136	104
	or unknown behaviour of	F	991	1	4	1	1	2	4	17	14	23	36	42	55	48	73	95	104	151	139	181
	lymphoid, haematopoietic and
	related tissue
D48	Neoplasm of uncertain or	M	565	3	8	2	12	16	22	24	16	30	24	25	32	29	42	38	55	63	63	61
	unknown behaviour of other	F	592	6	5	4	12	20	14	34	37	38	58	49	59	39	58	40	35	27	23	34
	and unspecified sites
1. This table does not include the ICD-10 codes that are non mandatory. See section 3.3 for the codes excluded and for the total figure of all cancer registrations.
2. These figures exclude non-melanoma skin cancer (ICD-10 C44) - see section 3.2
3. There has been a large increase in the number of registrations of C44 in the Eastern Cancer Registry and Information Centre. See section 3.1 for more information.
4. There has been a large increase in the number of registrations of C96 in the Northern and Yorkshire Cancer Registry and Information Service. See section 3.1 for more information.
Source: Office for National Statistics
Data or interest (copied from above)
ICD-10 code	Site description			Age group
			All ages	Under 1	1­4	5­9	10­14	15-19	20-24	25-29	30-34	35-39	40-44	45-49	50-54	55-59	60-64	65-69	70-74	75-79	80-84	85 and over
C61	Malignant neoplasm of prostate	M	30893	-	1	-	1	-	1	-	1	5	53	222	809	2273	4522	5578	5937	5492	3423	2575
Data transposed			Correct age groups
	C61
	Malignant neoplasm of prostate
	M
All ages	30893
Under 1	0		Ages	Number of prostate cancer incident cases, 2008 England
1­4	1		0-4	1
5­9	0		5­9	0
10­14	1		10­14	1
15-19	0		15-19	0
20-24	1		20-24	1
25-29	0		25-29	0
30-34	1		30-34	1
35-39	5		35-39	5
40-44	53		40-44	53
45-49	222		45-49	222
50-54	809		50-54	809
55-59	2273		55-59	2273
60-64	4522		60-64	4522
65-69	5578		65-69	5578
70-74	5937		70-74	5937
75-79	5492		75-79	5492
80-84	3423		80-84	3423
85 and over	2575		85+	2575
			SUM	30893

## Sheet: Incidence England 2009 ONS+
Prostate cancer incidence in England, 2009 (ONS)
(Data registered by June 2011 and released by ONS September 2011)
http://www.ons.gov.uk/ons/rel/vsob1/cancer-statistics-registrations--england--series-mb1-/no--40--2009/cancer-registrations-2009.xls
Data downloaded 04/11/2013
Table 1: Registrations of newly diagnosed cases of cancer (3rd digit):site‚ sex and age‚ 2009
																						England - Registered by June 2011
ICD-10 code	Site description		All	Age group
			ages
				Under 1	1­4	5­9	10­14	15-19	20-24	25-29	30-34	35-39	40-44	45-49	50-54	55-59	60-64	65-69	70-74	75-79	80-84	85 and
																						over
C00-C97,	All registrations	M	196543	56	262	190	251	432	646	1057	1396	2096	3531	5399	8313	13757	23642	27935	31481	31040	24814	20245
D00-D48 1,2		F	213926	74	254	146	212	443	2575	12586	8506	7843	9097	10764	12906	14701	21218	21238	21505	23040	21431	25387
C00-C97 2	All cancers	M	175512	45	241	175	210	370	556	917	1209	1790	3074	4758	7417	12377	21274	25125	28298	27726	21993	17957
		F	163086	68	232	119	169	298	586	1359	1979	3353	5897	8436	10528	12755	18511	18528	18929	20286	18746	22307
C00-C97	All cancers excluding nmsc3	M	134636	45	239	174	204	356	526	821	1004	1403	2289	3577	5794	9963	17078	19943	21801	20904	15974	12541
excl.C44		F	130043	67	232	119	166	284	553	1226	1730	2841	4911	7092	8913	10698	15394	14943	14875	15687	14115	16197
C00-C14	Malignant neoplasm of lip,	M	3735	-	1	3	6	9	8	21	26	66	156	277	450	572	594	478	406	321	191	150
	oral cavity and pharynx	F	2009	-	-	-	-	9	10	17	36	44	90	126	188	230	274	233	193	184	153	222
C00	Malignant neoplasm of lip	M	160	-	-	-	-	1	1	1	2	1	6	9	6	10	17	18	32	26	17	13
		F	102	-	-	-	-	-	-	2	1	-	5	3	1	6	14	8	7	16	18	21
C01	Malignant neoplasm of	M	352	-	-	-	-	-	-	-	2	5	12	25	63	65	62	50	38	16	11	3
	base of tongue	F	103	-	-	-	-	-	-	-	1	2	6	11	7	14	23	14	9	7	5	4
C02	Malignant neoplasm of	M	646	-	-	-	-	-	2	10	8	13	26	54	74	103	105	86	66	52	24	23
	other and unspecified	F	432	-	-	-	-	-	1	3	11	10	19	24	39	51	50	58	42	40	34	50
	parts of tongue
C03	Malignant neoplasm of gum	M	147	-	-	-	-	-	-	-	-	2	2	8	13	12	21	20	19	27	13	10
		F	158	-	-	-	-	1	1	1	-	4	3	5	7	9	15	20	11	31	20	30
C04	Malignant neoplasm of	M	279	-	-	-	-	-	-	-	-	7	12	16	34	54	53	43	28	18	7	7
	floor of mouth	F	111	-	-	-	-	-	-	1	-	1	1	3	13	14	24	22	9	9	4	10
C05	Malignant neoplasm of	M	182	-	-	1	1	2	1	1	2	1	7	10	10	33	31	32	24	14	5	7
	palate	F	138	-	-	-	-	-	-	2	4	5	9	10	15	13	17	19	13	8	13	10
C06	Malignant neoplasm of	M	272	-	-	-	-	-	-	-	1	4	11	24	24	31	37	39	31	37	16	17
	other and unspecified	F	187	-	-	-	-	1	1	-	3	1	7	5	9	15	21	15	28	25	17	39
	parts of mouth
C07	Malignant neoplasm of	M	265	-	-	-	1	2	1	3	3	3	10	11	12	21	33	26	34	35	30	40
	parotid gland	F	190	-	-	-	-	3	2	5	6	12	11	16	16	15	24	15	17	11	14	23
C08	Malignant neoplasm of	M	79	-	-	1	-	-	1	-	2	1	6	7	6	7	8	8	10	7	11	4
	other and unspecified	F	62	-	-	-	-	-	3	2	4	1	3	5	7	10	5	5	3	1	3	10
	major salivary glands
C09	Malignant neoplasm of	M	626	-	-	-	-	1	-	1	3	13	40	80	127	130	88	61	36	30	14	2
	tonsil	F	220	-	-	-	-	-	-	-	-	4	9	25	44	48	35	20	18	12	2	3
C10	Malignant neoplasm of	M	153	-	-	-	-	1	-	2	-	1	7	9	15	26	35	17	18	9	6	7
	oropharynx	F	65	-	-	-	-	-	-	-	-	-	2	4	8	7	12	10	6	9	5	2
C11	Malignant neoplasm of	M	145	-	1	1	3	2	2	1	2	14	10	14	19	10	21	13	16	9	2	5
	nasopharynx	F	68	-	-	-	-	4	1	1	6	3	3	6	5	8	12	4	8	1	4	2
C12	Malignant neoplasm of	M	168	-	-	-	-	-	-	1	-	-	4	5	20	21	36	26	24	15	13	3
	pyriform sinus	F	48	-	-	-	-	-	-	-	-	1	3	4	4	6	7	7	4	3	4	5
C13	Malignant neoplasm of	M	113	-	-	-	-	-	-	-	-	-	2	2	13	17	26	14	15	10	10	4
	hypopharynx	F	66	-	-	-	-	-	-	-	-	-	5	3	7	6	6	9	10	3	6	11
C14	Malignant neoplasm of	M	148	-	-	-	1	-	-	1	1	1	1	3	14	32	21	25	15	16	12	5
	other and ill-defined	F	59	-	-	-	-	-	1	-	-	-	4	2	6	8	9	7	8	8	4	2
	sites in the lip, oral
	cavity and pharynx
C15	Malignant neoplasm of	M	4470	-	-	-	-	-	-	5	4	26	62	122	251	423	634	649	669	657	532	436
	oesophagus	F	2217	-	-	-	-	-	-	1	1	6	14	39	74	134	202	249	312	316	373	496
C16	Malignant neoplasm of	M	3976	-	-	-	-	3	3	3	11	21	65	94	156	246	356	517	641	723	644	493
	stomach	F	2119	-	-	-	-	1	3	7	13	17	31	44	71	101	144	168	284	352	392	491
C17	Malignant neoplasm of	M	514	-	-	-	-	1	1	4	5	9	7	27	30	54	72	57	91	70	55	31
	small intestine	F	423	-	-	-	-	-	-	2	4	9	5	17	21	26	57	52	64	57	62	47
C18-C20	Malignant neoplasm of colon	M	18227	-	-	-	4	8	14	44	86	103	193	429	658	1188	2422	2816	2945	2998	2489	1830
	and rectum	F	14524	-	-	-	1	10	17	36	60	93	218	371	542	785	1531	1783	1948	2344	2217	2568
C18	Malignant neoplasm of	M	11141	-	-	-	4	6	12	28	47	64	113	225	323	619	1389	1676	1783	1926	1659	1267
	colon	F	10084	-	-	-	1	7	14	25	38	57	128	239	306	454	1032	1216	1341	1703	1632	1891
C19	Malignant neoplasm of	M	1397	-	-	-	-	1	-	5	6	6	14	26	52	99	211	225	228	233	179	112
	rectosigmoid junction	F	1025	-	-	-	-	-	-	1	6	6	19	21	41	72	118	147	152	143	147	152
C20	Malignant neoplasm of	M	5689	-	-	-	-	1	2	11	33	33	66	178	283	470	822	915	934	839	651	451
	rectum	F	3415	-	-	-	-	3	3	10	16	30	71	111	195	259	381	420	455	498	438	525
C21	Malignant neoplasm of	M	311	-	-	-	-	-	-	1	4	5	20	18	35	30	54	34	33	33	26	18
	anus and anal canal	F	542	-	-	-	-	-	-	2	3	11	20	36	48	66	91	68	56	46	41	54
C22	Malignant neoplasm of liver	M	2023	-	6	-	-	1	2	6	5	15	43	70	109	171	221	267	343	324	253	187
	and intrahepatic bile ducts	F	1259	6	3	-	2	1	2	4	6	6	19	30	50	62	101	121	178	215	200	253
C23	Malignant neoplasm of	M	173	-	-	-	-	-	-	-	1	1	3	3	6	13	18	14	24	31	28	31
	gallbladder	F	396	-	-	-	-	-	-	-	1	3	4	6	15	23	33	48	44	71	68	80
C24	Malignant neoplasm of	M	367	-	-	-	-	-	-	-	1	3	9	9	22	18	49	63	63	45	43	42
	other and unspecified	F	379	-	-	-	-	-	-	-	2	1	5	3	16	23	35	45	61	59	58	71
	parts of biliary tract
C25	Malignant neoplasm of	M	3436	-	-	-	-	1	-	2	5	17	44	102	141	296	410	510	526	581	416	385
	pancreas	F	3527	-	-	-	1	2	3	3	4	16	32	58	112	194	311	407	525	585	571	703
C26	Malignant neoplasm of	M	276	-	-	-	-	1	-	2	-	1	4	7	6	10	22	27	34	40	50	72
	other and ill-defined	F	344	-	-	-	-	-	1	2	-	1	6	8	5	10	15	20	18	51	61	146
	digestive organs
C30	Malignant neoplasm of	M	161	-	-	-	-	1	1	3	4	6	11	7	13	16	19	22	23	13	15	7
	nasal cavity and middle ear	F	104	-	-	-	-	-	-	1	1	2	3	6	5	7	18	8	14	12	11	16
C31	Malignant neoplasm of	M	66	-	1	-	-	1	-	-	3	4	-	4	3	8	9	7	7	7	5	7
	accessory sinuses	F	47	-	-	-	-	-	-	1	1	3	1	-	5	2	8	2	6	3	5	10
C32	Malignant neoplasm of	M	1496	-	-	-	-	-	1	-	-	8	28	54	105	187	271	230	249	174	121	68
	larynx	F	301	-	-	-	-	-	-	-	2	8	7	12	23	29	39	47	50	30	33	21
C33-C34	Malignant neoplasm of	M	18517	-	-	-	-	3	7	13	25	43	130	265	594	1198	2233	2824	3281	3233	2693	1975
	trachea, bronchus and lung	F	14633	-	-	-	-	4	5	6	13	44	136	324	562	1036	1718	1991	2341	2402	2110	1941
C33	Malignant neoplasm of	M	25	-	-	-	-	-	-	-	1	-	1	-	1	1	4	4	5	5	3	-
	trachea	F	11	-	-	-	-	-	1	-	-	-	-	1	-	1	1	-	-	4	1	2
C34	Malignant neoplasm of	M	18492	-	-	-	-	3	7	13	24	43	129	265	593	1197	2229	2820	3276	3228	2690	1975
	bronchus and lung	F	14622	-	-	-	-	4	4	6	13	44	136	323	562	1035	1717	1991	2341	2398	2109	1939
C37	Malignant neoplasm of	M	42	-	-	-	-	-	-	1	1	1	3	5	5	2	3	5	7	7	1	1
	thymus	F	51	-	-	-	-	-	-	-	-	3	5	6	3	3	8	10	5	-	7	1
C38	Malignant neoplasm of	M	106	-	1	-	1	1	2	5	3	1	4	1	3	7	12	15	10	15	12	13
	heart, mediastinum and	F	64	-	-	1	1	-	1	-	-	-	-	3	2	7	5	7	12	10	5	10
	pleura
C39	Malignant neoplasm of other	M	14	-	-	-	-	-	-	-	-	-	-	-	-	1	3	2	1	2	2	3
	and ill-defined sites in	F	10	-	-	-	-	-	-	-	-	-	-	-	1	1	-	-	-	5	1	2
	the respiratory system and
	intrathoracic organs
C40	Malignant neoplasm of	M	134	-	1	3	18	18	14	5	6	5	7	3	9	11	10	7	6	7	3	1
	bone and articular	F	103	-	5	5	14	12	4	8	3	2	2	6	6	7	6	5	2	5	1	10
	cartilage of limbs
C41	Malignant neoplasm of bone	M	178	-	1	1	5	10	9	8	4	7	14	13	10	10	19	18	20	10	9	10
	and articular cartilage of	F	111	2	-	1	5	4	4	2	8	6	7	10	7	5	10	7	8	6	9	10
	other and unspecified sites
C43	Malignant melanoma of skin	M	4707	-	-	-	4	16	47	81	126	188	290	311	323	397	637	580	562	499	340	306
		F	5064	-	-	-	3	24	80	162	229	305	445	424	385	413	592	460	429	397	344	372
C442	Other malignant neoplasms	M	40876	-	2	1	6	14	30	96	205	387	785	1181	1623	2414	4196	5182	6497	6822	6019	5416
	of skin	F	33043	1	-	-	3	14	33	133	249	512	986	1344	1615	2057	3117	3585	4054	4599	4631	6110
C45	Mesothelioma	M	1823	-	-	-	-	-	-	-	-	3	1	16	33	100	169	314	358	366	285	178
		F	370	-	-	-	-	-	-	-	-	-	5	12	10	20	44	57	69	68	43	42
C46	Kaposi's sarcoma	M	90	-	-	-	-	-	-	5	12	8	17	14	8	5	4	6	4	3	2	2
		F	22	-	-	-	1	-	1	2	3	2	4	2	-	1	1	-	2	1	1	1
C47	Malignant neoplasm of	M	43	3	5	-	2	-	3	3	3	2	3	3	2	-	4	4	2	-	4	-
	peripheral nerves and	F	32	2	2	1	-	-	-	3	1	3	5	3	3	1	5	-	2	1	-	-
	autonomic nervous system
C48	Malignant neoplasm of	M	125	2	2	1	-	1	3	-	1	-	7	4	2	9	22	18	18	16	11	8
	retroperitoneum and	F	446	2	3	-	1	-	1	-	5	5	8	18	27	42	62	62	75	67	38	30
	peritoneum
C49	Malignant neoplasm of other	M	753	2	6	6	5	15	14	18	19	34	36	35	51	67	85	85	80	71	62	62
	connective and soft tissue	F	617	3	10	4	10	12	11	9	22	28	31	32	48	46	54	68	61	57	49	62
C50	Malignant neoplasm of	M	325	-	-	-	1	-	-	-	1	3	9	18	26	19	45	46	47	39	37	34
	breast	F	40260	-	-	-	-	7	34	174	439	1127	2422	3816	4468	4150	5689	4773	3249	3462	2995	3455
C51	Malignant neoplasm of	F	943	-	-	-	-	-	3	5	12	22	36	54	59	55	76	75	96	122	141	187
	vulva
C52	Malignant neoplasm of	F	221	-	1	1	-	-	-	1	1	3	15	9	15	15	27	26	27	19	19	42
	vagina
C53	Malignant neoplasm of	F	2747	-	-	-	-	1	63	383	389	394	302	231	163	159	123	105	115	108	96	115
	cervix uteri
C54	Malignant neoplasm of	F	6198	-	-	-	-	2	3	9	22	47	111	217	447	845	1068	933	964	704	442	384
	corpus uteri
C55	Malignant neoplasm of	F	280	-	-	-	-	-	-	3	2	5	9	21	13	31	30	37	28	36	25	40
	uterus, part unspecified
C56-C57	Malignant neoplasm of ovary	F	5748	1	2	4	6	24	57	80	78	146	239	313	428	553	743	698	734	606	479	557
	and other unspecified female
	genital organs
C56	Malignant neoplasm of ovary	F	5514	1	2	4	6	24	57	78	76	144	232	305	411	523	717	661	698	586	449	540
C57	Malignant neoplasm of other	F	234	-	-	-	-	-	-	2	2	2	7	8	17	30	26	37	36	20	30	17
	and unspecified female
	genital organs
C58	Malignant neoplasm of	F	10	-	-	-	-	-	2	3	1	2	1	-	1	-	-	-	-	-	-	-
	placenta
C60	Malignant neoplasm of	M	410	-	-	-	-	-	-	1	2	6	14	15	28	46	58	46	65	48	43	38
	penis
C61	Malignant neoplasm of	M	34593	-	-	-	-	1	-	2	3	8	67	315	974	2506	5004	6422	6831	5948	3676	2836
	prostate
C62	Malignant neoplasm of	M	1830	-	4	1	-	58	161	309	319	278	236	172	107	61	46	25	19	15	6	13
	testis
C63	Malignant neoplasm of	M	66	-	-	1	-	-	3	-	-	2	3	1	5	4	13	5	11	7	6	5
	other and unspecified male
	genital organs
C64	Malignant neoplasm of	M	3993	3	26	4	2	6	5	6	16	64	119	183	295	408	555	555	607	512	357	270
	kidney, except renal pelvis	F	2496	5	23	6	3	3	5	7	18	26	76	102	169	221	314	287	303	357	276	295
C65	Malignant neoplasm of renal	M	324	-	-	-	-	-	-	-	2	4	3	7	10	23	39	37	67	63	41	28
	pelvis	F	202	-	-	-	-	-	-	1	-	2	1	5	7	6	19	22	39	42	32	26
C66	Malignant neoplasm of	M	279	-	-	-	-	-	-	-	-	-	3	2	4	12	29	41	44	65	53	26
	ureter	F	149	-	-	-	-	-	-	-	-	-	-	2	3	7	12	15	22	37	29	22
C67	Malignant neoplasm of	M	6541	1	2	1	-	-	1	2	8	16	40	99	160	335	595	866	1069	1209	1126	1011
	bladder	F	2405	-	2	-	-	-	1	6	4	14	20	24	48	110	180	224	338	382	447	605
C68	Malignant neoplasm of	M	125	-	-	-	-	1	-	-	-	-	1	7	6	5	8	12	19	25	24	17
	other and unspecified	F	39	-	-	-	-	-	-	-	-	-	1	1	2	2	4	5	9	3	5	7
	urinary organs
C69	Malignant neoplasm of eye	M	183	10	12	2	-	1	-	-	1	2	6	12	11	23	31	18	15	16	16	7
	and adnexa	F	161	10	11	1	2	-	1	2	4	6	4	10	8	18	15	16	16	14	12	11
C70	Malignant neoplasm of	M	38	-	-	-	2	1	-	-	1	5	2	3	1	4	5	3	3	5	2	1
	meninges	F	66	-	2	-	-	-	-	2	1	2	4	4	5	6	9	4	4	10	4	9
C71	Malignant neoplasm of brain	M	2290	4	29	46	44	29	28	62	58	75	98	138	197	220	318	268	228	228	139	81
		F	1669	7	35	26	32	23	26	34	32	46	64	85	84	159	193	194	177	177	146	129
C72	Malignant neoplasm of	M	74	1	11	7	2	4	1	-	2	3	5	8	10	4	3	4	3	3	3	-
	spinal cord, cranial nerves	F	64	3	7	4	7	2	4	4	3	2	1	2	1	4	6	3	2	5	3	1
	and other parts of central
	nervous system
C73	Malignant neoplasm of	M	538	-	-	-	1	10	14	20	35	43	55	42	39	62	46	45	44	32	29	21
	thyroid gland	F	1449	-	-	2	6	23	55	79	142	143	144	141	129	127	121	79	81	72	46	59
C74	Malignant neoplasm of	M	75	8	7	3	1	-	2	1	2	-	4	3	6	4	5	3	7	8	6	5
	adrenal gland	F	94	8	14	2	2	1	4	2	2	3	5	4	4	4	7	5	12	9	2	4
C75	Malignant neoplasm of	M	62	-	-	1	2	10	4	2	4	2	-	2	6	2	8	7	6	2	3	1
	other endocrine glands	F	56	-	1	2	1	3	-	-	3	2	1	3	6	4	8	3	8	2	5	4
	and related structures
C76	Malignant neoplasm of other	M	171	2	6	2	-	-	1	2	1	6	5	6	6	6	16	24	18	29	18	23
	and ill-defined sites	F	231	4	3	2	1	-	2	3	1	3	5	3	8	9	16	18	24	31	29	69
C77	Secondary and unspecified	M	438	-	-	-	-	-	4	2	4	5	16	26	48	55	69	51	56	43	28	31
	malignant neoplasm of	F	357	-	-	1	-	-	2	4	1	4	13	19	28	39	36	52	54	45	31	28
	lymph nodes
C78	Secondary malignant	M	1120	-	-	-	-	-	1	1	2	7	13	27	31	60	118	126	157	186	182	209
	neoplasm of respiratory	F	1371	-	-	-	-	-	-	2	2	8	11	21	47	66	107	134	178	223	222	350
	and digestive organs
C79	Secondary malignant	M	455	-	-	-	-	-	2	1	1	2	10	8	19	22	46	52	67	90	60	75
	neoplasm of other sites	F	443	-	-	-	-	-	-	2	4	6	6	14	22	21	35	43	56	68	65	101
C80	Malignant neoplasm without	M	2010	-	-	1	1	2	-	8	11	9	29	33	75	118	185	229	267	334	352	356
	specification of site	F	2498	-	1	1	-	3	3	8	6	15	40	53	51	118	172	198	269	362	473	725
C81	Hodgkin's disease	M	869	-	5	10	37	70	72	78	59	66	55	68	50	44	62	57	36	49	32	19
		F	674	-	1	4	12	60	75	74	41	59	41	33	38	40	51	34	41	33	18	19
C82-C85	Non-Hodgkin's lymphoma	M	5507	-	12	18	21	22	46	53	69	133	188	277	336	419	686	677	762	758	612	418
		F	4603	-	5	6	10	16	30	39	50	76	135	175	233	363	533	569	656	674	541	492
C82	Follicular (nodular)	M	863	-	-	-	-	1	3	6	11	25	43	62	68	91	120	101	127	100	70	35
	non-Hodgkins' lymphoma	F	972	-	-	-	-	4	3	9	7	22	44	54	69	114	143	133	136	112	71	51
C83	Diffuse non-Hodgkin's	M	2839	-	9	14	13	11	26	30	39	62	91	126	167	214	346	353	405	419	329	185
	lymphoma	F	2180	-	4	4	3	7	14	18	24	25	51	78	99	161	252	269	322	350	264	235
C84	Peripheral and cutaneous	M	398	-	-	-	1	4	4	10	7	16	16	26	26	27	55	53	50	40	34	29
	T-cell lymphomas	F	273	-	-	-	1	2	4	4	7	8	15	11	26	20	32	26	37	34	27	19
C85	Other and unspecified types	M	1407	-	3	4	7	6	13	7	12	30	38	63	75	87	165	170	180	199	179	169
	of non-Hodgkin's lymphoma	F	1178	-	1	2	6	3	9	8	12	21	25	32	39	68	106	141	161	178	179	187
C88	Malignant	M	125	-	-	-	-	-	-	-	-	1	1	1	3	9	15	14	21	22	19	19
	immunoproliferative	F	84	-	-	-	-	-	-	-	1	-	1	2	2	5	6	8	10	17	16	16
	diseases
C90	Multiple myeloma and	M	2267	-	-	1	-	1	1	2	3	13	51	74	128	158	304	264	374	353	294	246
	malignant plasma cell	F	1759	-	-	-	-	-	1	2	5	11	19	46	72	107	194	190	258	315	263	276
	neoplasms
C91-C95	Leukaemia	M	4084	9	100	60	44	48	50	37	42	71	98	135	187	287	408	466	546	562	507	427
		F	2933	12	98	45	44	36	37	29	40	45	72	78	116	173	229	264	338	393	387	497
C91	Lymphoid leukaemia	M	2183	4	88	44	28	30	23	11	11	19	35	71	102	164	239	264	296	289	239	226
		F	1421	7	80	34	29	16	7	8	6	9	14	35	50	83	122	146	174	179	184	238
C92	Myeloid leukaemia	M	1749	4	9	14	14	12	25	25	30	49	60	60	80	113	158	188	227	258	247	176
		F	1394	3	14	10	15	18	27	20	30	35	57	39	64	84	102	113	151	201	186	225
C93	Monocytic leukaemia	M	26	-	1	-	-	-	-	-	-	1	-	3	2	1	-	4	2	5	5	2
		F	13	-	-	-	-	1	2	-	3	-	-	1	-	1	1	-	2	2	-	-
C94	Other leukaemias of	M	20	-	-	1	-	-	-	-	-	-	-	1	-	3	4	2	3	4	1	1
	specified cell type	F	12	-	-	-	-	-	-	-	-	1	-	1	-	2	-	2	3	2	1	-
C95	Leukaemia of unspecified	M	106	1	2	1	2	6	2	1	1	2	3	-	3	6	7	8	18	6	15	22
	cell type	F	93	2	4	1	-	1	1	1	1	-	1	2	2	3	4	3	8	9	16	34
C96	Other and unspecified	M	48	-	1	2	1	1	1	1	2	2	1	2	1	6	4	2	6	5	5	5
	malignant neoplasms of	F	59	2	3	-	1	-	-	-	2	4	4	2	3	2	1	7	5	9	6	8
	lymphoid, haematopoietic
	and related tissue
C97	Malignant neoplasms of	M	33	-	-	-	-	1	-	1	1	-	-	-	-	2	5	9	3	2	6	3
	independent (primary)	F	60	-	-	-	-	1	2	-	6	-	5	6	4	5	6	4	3	6	7	5
	multiple sites
D00	Carcinoma in situ of oral	M	314	-	-	-	-	-	2	-	2	-	5	6	21	27	44	47	40	38	51	31
	cavity, oesophagus and	F	163	-	-	-	-	-	-	-	-	2	3	-	8	14	22	24	20	21	21	28
	stomach
D01	Carcinoma in situ of other	M	1250	-	-	-	-	1	1	4	6	13	23	29	60	87	233	242	196	152	118	85
	and unspecified digestive	F	930	-	-	-	-	-	3	4	8	17	18	42	55	61	126	161	129	116	107	83
	organs
D02	Carcinoma in situ of middle	M	232	-	-	-	1	1	1	1	-	4	2	10	12	22	36	35	42	33	21	11
	ear and respiratory system	F	97	-	-	-	1	1	-	1	-	2	5	6	2	7	11	13	15	15	13	5
D03	Melanoma in situ	M	1567	-	-	-	1	1	15	16	38	34	49	74	92	125	203	203	217	208	149	142
		F	1734	-	1	-	-	4	27	46	60	92	135	107	138	151	198	183	189	143	138	122
D04	Carcinoma in situ of skin	M	4599	-	-	1	2	-	4	8	10	22	52	84	133	205	372	577	709	846	856	718
		F	6674	-	-	-	-	-	1	12	15	20	49	78	138	231	443	662	939	1203	1344	1539
D05	Carcinoma in situ of breast	M	26	-	-	-	-	-	-	-	1	-	-	2	3	1	6	6	1	3	1	2
		F	4709	-	-	-	1	1	1	16	20	85	249	406	955	641	888	711	318	200	123	94
D06	Carcinoma in situ of	F	27438	-	-	-	-	60	1833	10960	6179	3974	2262	1161	514	220	170	52	26	18	7	2
	cervix uteri
D07	Carcinoma in situ of other	M	1007	-	-	-	-	1	6	8	10	15	12	19	39	105	199	228	183	125	37	20
	and unspecified genital	F	796	-	-	-	-	4	12	30	56	79	122	112	81	63	78	47	35	30	22	25
	organs
D09	Carcinoma in situ of other	M	2210	-	-	-	-	-	1	5	5	13	29	48	89	132	237	278	393	418	331	231
	and unspecified sites	F	643	-	-	-	-	-	3	2	5	2	11	9	20	40	64	85	102	113	89	98
D32	Benign neoplasm of meninges	M	384	-	-	-	-	3	7	6	7	14	18	25	29	35	46	44	34	37	38	41
		F	940	-	-	-	-	2	2	11	22	26	65	72	83	78	121	100	83	69	86	120
D33	Benign neoplasm of brain	M	230	1	3	-	5	2	6	4	20	16	21	23	23	21	35	21	12	9	5	3
	and other parts of central	F	238	-	7	3	3	3	6	12	15	15	18	26	24	25	22	24	13	8	6	8
	nervous system
D35.2	Benign neoplasm of	M	303	-	-	-	1	5	5	5	10	18	12	25	25	32	37	39	34	31	13	11
	pituitary gland	F	256	-	-	-	2	7	11	17	17	18	24	26	18	25	26	26	13	7	13	6
D35.3	Benign neoplasm of	M	-	-	-	-	-	-	-	-	-	-	-	-	-	-	-	-	-	-	-	-
	craniopharyngeal duct	F	-	-	-	-	-	-	-	-	-	-	-	-	-	-	-	-	-	-	-	-
D35.4	Benign neoplasm of	M	3	-	1	-	1	-	-	1	-	-	-	-	-	-	-	-	-	-	-	-
	pineal gland	F	-	-	-	-	-	-	-	-	-	-	-	-	-	-	-	-	-	-	-	-
D37	Neoplasm of uncertain or	M	758	4	-	-	5	12	9	20	6	23	28	34	41	60	89	122	89	91	76	49
	unknown behaviour of oral	F	763	-	1	-	9	19	17	15	24	22	27	43	44	53	80	67	73	115	70	84
	cavity and digestive organs
D38	Neoplasm of uncertain or	M	97	-	-	-	1	1	-	1	1	1	2	2	4	8	7	17	18	12	14	8
	unknown behaviour of middle	F	82	-	1	-	-	-	1	2	1	4	4	6	6	5	10	5	6	6	14	11
	ear and respiratory and
	intrathoracic organs
D39	Neoplasm of uncertain or	F	487	-	-	1	4	9	17	28	35	30	57	47	48	39	49	39	25	28	13	18
	unknown behaviour of female
	genital organs
D40	Neoplasm of uncertain or	M	93	1	1	-	-	2	1	11	3	7	16	8	4	3	6	6	8	6	5	5
	unknown behaviour of male
	genital organs
D41	Neoplasm of uncertain or	M	4052	1	-	-	2	3	1	6	19	36	55	93	152	276	454	578	702	729	580	365
	unknown behaviour of	F	1483	2	-	1	-	2	1	4	7	10	20	37	77	101	166	204	246	232	199	174
	urinary organs
D42	Neoplasm of uncertain or	M	57	-	-	-	2	1	1	2	1	3	2	4	5	4	8	11	5	4	2	2
	unknown behaviour of	F	76	-	-	1	-	1	-	2	3	4	1	8	6	4	14	11	6	7	5	3
	meninges
D43	Neoplasm of uncertain or	M	249	1	5	7	6	11	7	10	11	10	9	13	10	8	21	13	25	31	24	27
	unknown behaviour of brain	F	225	1	4	10	9	4	5	6	10	5	9	7	11	8	12	9	15	25	32	43
	and central nervous system
D44	Neoplasm of uncertain or	M	98	-	-	-	6	3	5	6	3	7	9	8	11	6	5	8	12	5	2	2
	unknown behaviour of	F	164	-	1	2	3	6	5	9	10	4	13	12	10	17	22	19	11	5	6	9
	endocrine glands
D45	Polycythaemia vera	M	639	-	-	-	1	2	3	3	7	19	45	58	53	84	76	87	71	62	43	25
		F	377	-	-	-	-	1	1	2	3	9	13	15	26	31	32	52	47	53	46	46
D46	Myelodysplastic syndromes	M	1267	-	3	-	-	2	5	2	3	10	5	13	17	29	73	102	180	247	263	313
		F	937	-	1	-	1	4	3	2	3	4	16	7	17	28	43	71	106	151	154	326
D47	Other neoplasms of uncertain	M	1104	1	3	2	-	5	3	5	10	19	34	36	50	73	135	112	171	168	137	140
	or unknown behaviour of	F	1006	1	2	1	-	5	6	16	12	25	29	32	40	54	75	89	119	163	147	190
	lymphoid, haematopoietic and
	related tissue
D48	Neoplasm of uncertain or	M	492	2	5	5	7	6	7	16	14	22	29	27	23	37	46	34	41	59	55	57
	unknown behaviour of other	F	622	2	4	8	10	12	34	30	22	41	50	69	57	50	35	56	40	26	30	46
	and unspecified sites
1. This table does not include the ICD-10 codes that are non mandatory. See section 3.3 for the codes excluded.
2. There have been some fairly large fluctuations in the number of registrations of C44 across the regions. See section 3.1 for more information.
3. These figures exclude non-melanoma skin cancer (ICD-10 C44) - see section 3.2
Source: Office for National Statistics
Data of interest (copied from above)
ICD-10 code	Site description												Age group
			All ages	Under 1	1­4	5­9	10­14	15-19	20-24	25-29	30-34	35-39	40-44	45-49	50-54	55-59	60-64	65-69	70-74	75-79	80-84	85 and over
C61	Malignant neoplasm of prostate	M	34593	-	-	-	-	1	-	2	3	8	67	315	974	2506	5004	6422	6831	5948	3676	2836
Data transposed			Correct age groups
	C61
	Malignant neoplasm of prostate
	M
All ages	34593
Under 1	0		Ages	Number of prostate cancer incident cases, 2009 England
1­4	0		0-4	0
5­9	0		5­9	0
10­14	0		10­14	0
15-19	1		15-19	1
20-24	0		20-24	0
25-29	2		25-29	2
30-34	3		30-34	3
35-39	8		35-39	8
40-44	67		40-44	67
45-49	315		45-49	315
50-54	974		50-54	974
55-59	2506		55-59	2506
60-64	5004		60-64	5004
65-69	6422		65-69	6422
70-74	6831		70-74	6831
75-79	5948		75-79	5948
80-84	3676		80-84	3676
85 and over	2836		85+	2836
			SUM	34593

## Sheet: Incidence England 2010 ONS+
Prostate cancer incidence in England, 2010 (ONS)
(Data registered by December 2011 and released by ONS June 2012)
http://www.ons.gov.uk/ons/rel/vsob1/cancer-statistics-registrations--england--series-mb1-/no--41--2010/rft-cancer-registrations-2010.xls
Data downloaded 04/11/2013
Table 1: Registrations of newly diagnosed cases of cancer (3rd digit): site‚ sex and age‚ 2010
																						England - Registered by December 2011
ICD-10 code	Site description		All	Age group
			ages
				Under 1	1­4	5­9	10­14	15-19	20-24	25-29	30-34	35-39	40-44	45-49	50-54	55-59	60-64	65-69	70-74	75-79	80-84	85 and
																						over
C00-C97,	All registrations	M	203544	93	274	214	251	442	697	1091	1466	2096	3511	5614	8759	13810	24699	29340	32653	31995	25340	21199
D00-D48 1,2		F	213845	69	255	133	199	445	1924	11549	6777	6648	8557	11318	13382	14770	21977	22512	22241	23482	21766	25841
C00-C97 2	All cancers	M	182760	71	253	183	204	367	604	967	1271	1853	3086	5001	7871	12524	22236	26446	29570	28754	22584	18915
		F	169141	57	235	114	148	316	607	1298	2000	3343	5987	9091	11147	12776	19322	19896	19831	20895	19264	22814
C00-C97	All cancers excluding nmsc 3	M	136372	69	251	183	198	342	556	872	1066	1425	2275	3655	6005	9798	17348	20572	22269	20906	15817	12765
excl.C44		F	132386	55	233	111	143	297	552	1163	1708	2803	4923	7558	9364	10480	15710	15743	15079	15728	14418	16318
C00-C14	Malignant neoplasm of lip,	M	3907	-	-	-	4	9	10	15	32	63	158	308	451	584	708	514	386	290	217	158
	oral cavity and pharynx	F	2149	-	1	-	2	12	11	16	29	44	80	120	196	245	301	239	241	198	189	225
C00	Malignant neoplasm of lip	M	173	-	-	-	-	-	-	-	1	4	4	8	9	10	19	19	30	25	27	17
		F	99	-	-	-	-	-	-	-	2	-	1	2	7	2	5	7	15	16	18	24
C01	Malignant neoplasm of	M	426	-	-	-	-	-	-	-	2	3	15	36	55	88	95	47	41	26	15	3
	base of tongue	F	127	-	-	-	-	-	-	1	1	2	3	6	16	21	21	19	16	8	7	6
C02	Malignant neoplasm of	M	658	-	-	-	-	2	1	5	6	15	27	52	92	90	117	83	54	52	39	23
	other and unspecified	F	440	-	-	-	-	-	3	1	3	11	20	20	42	58	57	52	47	43	31	52
	parts of tongue
C03	Malignant neoplasm of gum	M	159	-	-	-	-	-	1	-	-	2	4	6	8	15	28	27	23	18	14	13
		F	145	-	-	-	-	-	-	-	1	1	-	3	4	10	15	17	19	23	25	27
C04	Malignant neoplasm of	M	260	-	-	-	-	-	-	-	1	1	11	20	26	50	60	31	40	14	4	2
	floor of mouth	F	135	-	-	-	-	-	-	-	-	2	5	11	20	16	15	18	19	13	8	8
C05	Malignant neoplasm of	M	214	-	-	-	-	1	1	-	1	2	11	15	24	41	42	30	21	10	5	10
	palate	F	167	-	-	-	-	2	-	4	1	3	7	10	12	19	22	22	19	13	19	14
C06	Malignant neoplasm of	M	262	-	-	-	1	-	1	-	3	4	10	12	23	32	52	41	29	26	14	14
	other and unspecified	F	223	-	-	-	1	2	-	1	2	3	8	12	13	24	22	23	26	30	25	31
	parts of mouth
C07	Malignant neoplasm of	M	243	-	-	-	3	2	4	7	4	5	9	7	14	15	19	29	20	38	32	35
	parotid gland	F	195	-	-	-	1	5	4	4	8	9	10	8	16	9	28	21	19	9	22	22
C08	Malignant neoplasm of	M	58	-	-	-	-	1	-	-	1	3	6	6	1	5	10	9	5	4	4	3
	other and unspecified	F	74	-	-	-	-	-	1	1	3	4	2	4	3	8	16	5	9	6	6	6
	major salivary glands
C09	Malignant neoplasm of	M	711	-	-	-	-	-	-	2	2	16	42	96	118	135	130	70	50	23	17	10
	tonsil	F	270	-	-	-	-	1	-	1	2	5	14	34	42	43	61	23	21	8	10	5
C10	Malignant neoplasm of	M	182	-	-	-	-	-	-	-	-	3	5	12	23	28	35	39	14	9	10	4
	oropharynx	F	52	-	-	-	-	-	-	-	-	1	1	3	3	11	12	7	3	6	3	2
C11	Malignant neoplasm of	M	128	-	-	-	-	2	2	1	10	3	9	12	17	10	13	9	13	13	10	4
	nasopharynx	F	69	-	1	-	-	2	2	3	5	2	3	4	4	7	11	2	7	7	1	8
C12	Malignant neoplasm of	M	190	-	-	-	-	1	-	-	-	1	1	11	22	29	31	45	21	13	8	7
	pyriform sinus	F	41	-	-	-	-	-	-	-	-	1	1	2	4	9	5	5	4	4	4	2
C13	Malignant neoplasm of	M	107	-	-	-	-	-	-	-	-	-	1	9	6	18	25	17	9	10	6	6
	hypopharynx	F	49	-	-	-	-	-	-	-	-	-	-	-	4	4	4	10	10	6	5	6
C14	Malignant neoplasm of	M	136	-	-	-	-	-	-	-	1	1	3	6	13	18	32	18	16	9	12	7
	other and ill-defined	F	63	-	-	-	-	-	1	-	1	-	5	1	6	4	7	8	7	6	5	12
	sites in the lip, oral
	cavity and pharynx
C15	Malignant neoplasm of	M	4663	-	-	-	-	-	-	6	4	22	62	142	264	418	645	685	756	637	574	448
	oesophagus	F	2286	-	-	-	-	1	1	-	2	3	14	39	76	116	202	248	284	373	409	518
C16	Malignant neoplasm of	M	3781	-	-	-	-	2	2	2	10	32	58	100	143	209	337	457	634	702	584	509
	stomach	F	2137	-	-	-	-	1	2	9	17	12	46	61	64	105	153	180	288	345	365	489
C17	Malignant neoplasm of	M	536	-	-	-	-	-	-	3	5	7	18	15	36	47	68	75	85	75	59	43
	small intestine	F	390	-	-	-	-	1	-	-	2	3	9	20	23	26	40	48	60	47	54	57
C18-C20	Malignant neoplasm of colon	M	18590	-	-	-	7	7	17	39	70	82	215	434	739	1173	2526	2970	3080	2969	2377	1885
	and rectum	F	14628	-	-	-	1	7	28	55	75	90	208	364	570	837	1510	1876	1999	2318	2202	2488
C18	Malignant neoplasm of	M	11388	-	-	-	7	6	7	29	45	55	132	228	406	598	1456	1739	1894	1949	1556	1281
	colon	F	10276	-	-	-	1	7	21	39	53	57	122	204	325	542	979	1303	1451	1695	1639	1838
C19	Malignant neoplasm of	M	1382	-	-	-	-	-	3	2	2	1	12	36	51	107	209	264	206	203	167	119
	rectosigmoid junction	F	986	-	-	-	-	-	3	2	7	2	17	29	46	60	132	135	119	157	139	138
C20	Malignant neoplasm of	M	5820	-	-	-	-	1	7	8	23	26	71	170	282	468	861	967	980	817	654	485
	rectum	F	3366	-	-	-	-	-	4	14	15	31	69	131	199	235	399	438	429	466	424	512
C21	Malignant neoplasm of	M	379	-	-	-	-	-	2	-	1	5	14	32	36	36	58	57	48	33	34	23
	anus and anal canal	F	537	-	-	-	-	-	1	2	3	8	21	36	49	64	80	50	72	44	48	59
C22	Malignant neoplasm of liver	M	2231	3	4	3	1	3	1	8	12	14	32	85	123	191	265	319	339	329	265	234
	and intrahepatic bile ducts	F	1329	1	2	1	2	1	5	2	6	6	13	25	51	73	120	131	184	214	223	269
C23	Malignant neoplasm of	M	166	-	-	-	-	-	-	-	-	-	3	2	6	8	11	20	26	38	25	27
	gallbladder	F	455	-	-	-	-	1	1	-	1	1	4	14	20	34	45	64	54	55	68	93
C24	Malignant neoplasm of	M	429	-	-	-	-	-	-	2	1	2	4	11	19	21	42	64	78	65	67	53
	other and unspecified	F	419	-	-	-	-	-	-	-	1	1	2	9	15	24	44	55	60	64	60	84
	parts of biliary tract
C25	Malignant neoplasm of	M	3497	-	-	-	-	1	1	3	6	19	38	90	157	250	453	511	527	570	482	389
	pancreas	F	3561	-	1	-	1	-	1	4	6	13	31	65	113	167	355	419	512	586	549	738
C26	Malignant neoplasm of	M	291	-	-	-	-	-	-	-	-	-	3	9	9	18	23	34	41	46	47	61
	other and ill-defined	F	374	-	-	-	-	-	1	2	1	2	1	8	9	14	23	23	32	40	58	160
	digestive organs
C30	Malignant neoplasm of	M	153	-	-	1	2	-	-	2	1	2	6	11	9	18	27	15	19	14	12	14
	nasal cavity and middle ear	F	127	-	-	1	-	1	-	2	1	4	5	2	6	10	19	23	12	9	16	16
C31	Malignant neoplasm of	M	73	-	-	1	-	-	-	-	-	1	4	6	6	8	11	8	9	6	8	5
	accessory sinuses	F	44	-	-	-	-	1	-	-	1	1	1	3	-	4	6	3	6	5	4	9
C32	Malignant neoplasm of	M	1529	-	-	-	-	1	-	2	1	6	27	56	123	185	260	264	226	184	109	85
	larynx	F	308	-	-	-	-	-	-	-	2	-	6	12	23	39	46	56	41	32	26	25
C33-C34	Malignant neoplasm of	M	18756	-	-	-	-	3	5	6	14	54	120	309	602	1243	2183	2826	3348	3292	2664	2087
	trachea, bronchus and lung	F	15062	-	1	-	-	4	10	6	22	46	106	303	571	992	1785	2136	2395	2426	2233	2026
C33	Malignant neoplasm of	M	18	-	-	-	-	-	-	-	1	-	-	-	1	3	-	4	3	3	-	3
	trachea	F	21	-	1	-	-	1	-	-	-	-	-	2	1	5	3	5	1	-	1	1
C34	Malignant neoplasm of	M	18738	-	-	-	-	3	5	6	13	54	120	309	601	1240	2183	2822	3345	3289	2664	2084
	bronchus and lung	F	15041	-	-	-	-	3	10	6	22	46	106	301	570	987	1782	2131	2394	2426	2232	2025
C37	Malignant neoplasm of	M	48	-	-	-	-	-	-	1	1	3	2	3	4	3	7	6	7	5	4	2
	thymus	F	48	-	-	-	1	-	-	-	5	-	1	4	4	4	4	10	3	8	2	2
C38	Malignant neoplasm of	M	94	1	1	-	2	-	3	3	2	3	3	5	5	2	10	7	8	14	12	13
	heart, mediastinum and	F	70	1	3	2	-	1	-	-	1	1	8	-	3	2	5	10	10	9	2	12
	pleura
C39	Malignant neoplasm of other	M	9	-	-	-	-	-	-	1	-	-	-	-	-	1	1	1	3	-	-	2
	and ill-defined sites in	F	10	-	-	-	-	-	-	-	-	-	-	-	-	2	2	1	1	2	1	1
	the respiratory system and
	intrathoracic organs
C40	Malignant neoplasm of	M	148	1	1	6	18	22	12	9	6	3	10	10	7	9	5	10	5	5	8	1
	bone and articular	F	104	1	-	9	11	11	6	6	6	6	5	3	2	3	10	5	5	4	4	7
	cartilage of limbs
C41	Malignant neoplasm of bone	M	169	1	1	2	9	4	9	8	17	8	6	6	17	14	14	20	10	13	7	3
	and articular cartilage of	F	91	1	1	-	3	3	5	4	4	-	5	3	3	7	5	11	9	12	7	8
	other and unspecified sites
C43	Malignant melanoma of skin	M	5151	-	-	-	1	16	44	95	125	188	268	309	409	481	643	589	670	559	419	335
		F	5505	-	-	1	2	31	106	169	217	342	417	466	453	464	592	520	483	450	363	429
C44 2	Other malignant neoplasms	M	46388	2	2	-	6	25	48	95	205	428	811	1346	1866	2726	4888	5874	7301	7848	6767	6150
	of skin	F	36755	2	2	3	5	19	55	135	292	540	1064	1533	1783	2296	3612	4153	4752	5167	4846	6496
C45	Mesothelioma	M	1829	-	-	-	-	-	-	-	-	1	4	11	32	81	210	289	359	376	287	179
		F	382	-	-	-	-	1	-	-	-	1	5	13	12	24	47	53	58	59	60	49
C46	Kaposi's sarcoma	M	105	-	-	-	-	-	1	7	13	17	17	9	15	5	6	8	2	4	-	1
		F	30	-	-	-	-	-	-	3	3	4	1	3	3	1	-	3	2	2	1	4
C47	Malignant neoplasm of	M	45	3	1	1	1	-	1	4	5	2	4	5	-	2	3	4	2	2	2	3
	peripheral nerves and	F	26	-	3	-	1	1	-	-	1	1	3	6	2	1	-	1	4	1	1	-
	autonomic nervous system
C48	Malignant neoplasm of	M	121	-	-	-	1	1	1	1	-	1	5	7	6	10	19	21	20	14	11	3
	retroperitoneum and	F	468	-	1	-	-	3	1	4	2	2	7	17	20	34	67	80	86	70	46	28
	peritoneum
C49	Malignant neoplasm of other	M	777	6	11	7	11	15	16	22	24	28	43	45	53	53	80	77	80	73	69	64
	connective and soft tissue	F	607	3	7	5	5	18	11	26	22	24	25	31	56	42	53	51	40	59	59	70
C50	Malignant neoplasm of	M	353	-	-	-	-	-	-	2	1	4	11	11	19	30	37	47	59	47	48	37
	breast	F	41259	-	-	-	1	1	23	144	492	1137	2528	4164	4637	4005	5618	5009	3430	3492	3073	3505
C51	Malignant neoplasm of	F	967	-	-	-	-	1	1	3	9	18	36	57	62	65	78	88	91	147	124	187
	vulva
C52	Malignant neoplasm of	F	238	-	2	-	-	-	-	1	2	4	8	9	15	20	25	32	25	20	28	47
	vagina
C53	Malignant neoplasm of	F	2305	-	-	-	-	-	45	306	290	290	260	192	165	139	159	94	103	81	88	93
	cervix uteri
C54	Malignant neoplasm of	F	6590	-	-	-	-	-	3	11	28	41	120	229	503	819	1198	997	984	755	520	382
	corpus uteri
C55	Malignant neoplasm of	F	244	-	-	-	-	-	-	1	-	3	11	10	23	24	33	32	23	33	15	36
	uterus, part unspecified
C56-C57	Malignant neoplasm of ovary	F	5807	-	1	1	12	25	53	65	109	140	244	366	424	529	753	720	684	607	540	534
	and other unspecified female
	genital organs
C56	Malignant neoplasm of ovary	F	5535	-	1	1	12	25	53	62	108	137	235	351	393	508	719	673	653	576	515	513
C57	Malignant neoplasm of other	F	272	-	-	-	-	-	-	3	1	3	9	15	31	21	34	47	31	31	25	21
	and unspecified female
	genital organs
C58	Malignant neoplasm of	F	9	-	-	-	-	3	-	1	1	1	2	-	-	-	-	-	1	-	-	-
	placenta
C60	Malignant neoplasm of	M	409	-	-	-	-	-	-	1	5	3	35	26	26	43	45	56	53	57	31	28
	penis
C61	Malignant neoplasm of	M	34892	-	1	-	2	1	1	-	2	6	57	288	970	2393	5067	6756	6821	6094	3654	2779
	prostate
C62	Malignant neoplasm of	M	1871	1	6	2	7	41	180	318	325	286	237	191	105	67	45	21	12	9	8	10
	testis
C63	Malignant neoplasm of	M	59	-	2	1	-	-	-	-	1	-	-	2	7	5	7	8	9	5	5	7
	other and unspecified male
	genital organs
C64	Malignant neoplasm of	M	4116	4	19	9	2	1	7	12	22	78	139	195	299	357	614	516	616	524	388	314
	kidney, except renal pelvis	F	2630	5	32	4	1	2	3	10	15	40	49	88	176	210	358	312	350	368	282	325
C65	Malignant neoplasm of renal	M	330	-	-	-	-	-	-	-	1	1	6	6	17	19	47	43	52	56	50	32
	pelvis	F	209	-	-	-	-	-	-	-	1	1	2	4	7	8	20	25	39	35	36	31
C66	Malignant neoplasm of	M	267	-	-	-	-	-	-	-	-	-	-	2	10	14	37	31	59	56	34	24
	ureter	F	147	-	-	-	-	-	-	-	-	-	-	1	2	6	15	18	30	28	24	23
C67	Malignant neoplasm of	M	6296	1	1	-	-	-	1	6	12	16	32	85	155	304	564	825	1069	1184	1074	967
	bladder	F	2446	-	-	-	-	-	-	1	3	10	25	36	55	108	202	260	340	406	440	560
C68	Malignant neoplasm of	M	137	-	-	-	-	-	-	-	-	-	1	2	7	5	17	18	29	18	24	16
	other and unspecified	F	39	-	-	-	-	-	-	-	-	1	-	-	2	3	3	1	7	3	9	10
	urinary organs
C69	Malignant neoplasm of eye	M	213	9	13	3	1	1	1	2	7	6	8	14	28	13	25	23	18	19	9	13
	and adnexa	F	170	5	11	-	1	2	3	3	1	7	9	11	9	14	12	18	17	21	15	11
C70	Malignant neoplasm of	M	33	-	1	2	-	-	-	2	1	2	2	1	2	1	4	2	3	4	2	4
	meninges	F	46	-	-	-	-	-	-	-	2	3	-	1	4	3	3	1	7	6	6	10
C71	Malignant neoplasm of brain	M	2270	13	31	42	27	45	39	61	56	70	89	138	177	192	289	278	262	209	163	89
		F	1665	13	44	23	24	19	36	37	24	50	77	82	113	149	203	172	185	177	122	115
C72	Malignant neoplasm of	M	55	4	4	5	1	1	1	4	2	3	7	4	2	5	4	2	4	-	2	-
	spinal cord, cranial nerves	F	43	1	5	1	2	1	4	5	4	2	3	3	3	-	4	2	1	-	1	1
	and other parts of central
	nervous system
C73	Malignant neoplasm of	M	630	-	-	2	2	6	12	27	37	45	51	51	52	63	66	56	55	51	28	26
	thyroid gland	F	1578	-	3	-	5	33	55	93	133	179	176	170	144	105	126	102	79	62	66	47
C74	Malignant neoplasm of	M	71	4	11	2	1	-	-	1	2	-	2	3	3	6	7	6	9	7	3	4
	adrenal gland	F	94	10	11	2	1	2	1	3	1	2	7	5	4	3	11	8	4	10	3	6
C75	Malignant neoplasm of	M	55	-	-	3	4	5	3	-	2	4	1	2	4	6	8	3	2	3	3	2
	other endocrine glands	F	47	-	1	-	1	2	3	2	1	3	2	3	3	-	5	3	3	6	4	5
	and related structures
C76	Malignant neoplasm of other	M	187	5	6	3	-	1	2	1	3	1	4	7	14	8	13	23	22	20	17	37
	and ill-defined sites	F	278	2	5	2	1	1	1	1	1	7	3	14	9	16	20	21	23	28	31	92
C77	Secondary and unspecified	M	397	-	-	-	-	1	-	1	5	6	18	22	43	50	51	59	48	36	36	21
	malignant neoplasm of	F	289	-	-	-	-	-	-	1	7	8	7	13	21	22	39	48	35	34	29	25
	lymph nodes
C78	Secondary malignant	M	1063	-	-	-	-	-	1	4	5	6	13	19	32	63	110	132	160	158	165	195
	neoplasm of respiratory	F	1360	-	-	-	-	-	4	4	2	11	23	32	44	65	96	151	163	215	228	322
	and digestive organs
C79	Secondary malignant	M	462	-	-	-	1	1	-	1	-	2	5	10	15	29	49	62	69	63	79	76
	neoplasm of other sites	F	409	-	-	-	-	1	-	-	3	5	8	15	16	21	44	35	47	66	62	86
C80	Malignant neoplasm without	M	1772	-	-	-	1	1	2	3	6	12	28	40	52	92	161	188	248	271	315	352
	specification of site	F	2173	-	1	-	-	1	2	4	8	12	23	44	79	94	119	154	216	327	416	673
C81	Hodgkin's disease	M	887	-	2	6	19	76	87	79	75	75	72	49	66	52	61	59	42	35	21	11
		F	669	-	-	3	12	64	74	66	47	64	49	43	24	47	41	35	32	33	17	18
C82-C85	Non-Hodgkin's lymphoma	M	5571	-	13	18	24	31	42	62	94	141	205	263	320	487	704	702	786	729	549	401
		F	4702	-	6	9	13	11	22	46	59	83	130	192	272	386	550	597	608	635	576	507
C82	Follicular (nodular)	M	982	-	-	1	2	2	7	10	21	35	46	69	81	117	143	129	135	87	55	42
	non-Hodgkin's lymphoma	F	1083	-	-	-	-	1	-	5	14	22	44	72	94	106	147	172	149	106	92	59
C83	Diffuse non-Hodgkin's	M	2946	-	8	12	10	19	25	30	52	67	104	129	145	219	389	386	428	409	323	191
	lymphoma	F	2262	-	5	4	5	4	19	26	28	30	57	77	109	181	241	269	295	348	305	259
C84	Peripheral and cutaneous	M	398	-	1	2	3	5	2	7	10	9	18	21	25	51	40	40	56	51	38	19
	T-cell lymphomas	F	253	-	-	2	-	-	1	7	4	8	9	19	9	26	40	19	24	30	29	26
C85	Other and unspecified types	M	1245	-	4	3	9	5	8	15	11	30	37	44	69	100	132	147	167	182	133	149
	of non-Hodgkin's lymphoma	F	1104	-	1	3	8	6	2	8	13	23	20	24	60	73	122	137	140	151	150	163
C88	Malignant	M	142	-	-	-	-	-	1	-	-	2	-	-	5	9	12	21	23	20	23	26
	immunoproliferative	F	82	-	-	-	-	-	-	-	-	-	1	-	2	5	8	9	8	16	11	22
	diseases
C90	Multiple myeloma and	M	2185	-	-	-	-	-	1	3	1	23	30	62	108	144	253	321	365	367	261	246
	malignant plasma cell	F	1756	-	-	-	-	-	-	3	5	14	25	46	60	112	195	199	273	300	245	279
	neoplasms
C91-C95	Leukaemia	M	4116	12	121	64	49	45	50	42	49	69	96	142	191	267	431	453	599	543	476	417
		F	2934	12	90	47	40	29	28	41	28	50	63	95	138	164	253	297	328	379	356	496
C91	Lymphoid leukaemia	M	2249	3	100	52	34	25	15	11	17	25	35	65	111	155	267	256	335	290	239	214
		F	1395	9	68	39	30	11	5	8	7	17	25	29	57	81	136	150	167	190	166	200
C92	Myeloid leukaemia	M	1715	5	12	8	13	17	33	29	28	40	58	69	77	103	154	187	249	226	223	184
		F	1409	3	12	7	10	17	20	33	18	29	35	62	77	74	109	137	148	177	179	262
C93	Monocytic leukaemia	M	28	1	-	-	1	2	-	-	1	-	-	2	1	3	1	3	3	5	3	2
		F	27	-	1	-	-	-	1	-	1	3	1	1	1	2	1	4	3	1	2	5
C94	Other leukaemias of	M	31	2	3	-	-	1	-	-	-	1	1	2	1	1	5	3	2	3	3	3
	specified cell type	F	16	-	2	-	-	-	-	-	-	1	-	1	-	2	1	1	1	1	2	4
C95	Leukaemia of unspecified	M	93	1	6	4	1	-	2	2	3	3	2	4	1	5	4	4	10	19	8	14
	cell type	F	87	-	7	1	-	1	2	-	2	-	2	2	3	5	6	5	9	10	7	25
C96	Other and unspecified	M	38	1	1	-	-	-	-	1	2	1	1	-	4	2	2	7	5	4	3	4
	malignant neoplasms of	F	24	-	1	-	-	-	1	1	-	1	5	2	3	1	2	3	-	3	-	1
	lymphoid, haematopoietic
	and related tissue
C97	Malignant neoplasms of	M	18	-	-	-	-	1	-	-	-	-	1	-	1	2	3	3	2	2	3	-
	independent (primary)	F	30	-	-	-	-	-	-	-	2	1	3	4	1	3	3	4	2	3	1	3
	multiple sites
D00	Carcinoma in situ of oral	M	371	-	-	-	-	-	-	-	-	3	7	17	26	37	52	50	55	45	47	32
	cavity, oesophagus and	F	176	-	-	-	-	-	1	1	2	2	4	9	10	7	13	24	28	23	26	26
	stomach
D01	Carcinoma in situ of other	M	1276	-	-	-	-	1	2	5	6	5	19	23	58	78	224	269	228	142	124	92
	and unspecified digestive	F	938	-	-	-	-	-	4	6	1	15	32	32	54	59	128	162	128	122	106	89
	organs
D02	Carcinoma in situ of middle	M	239	-	-	-	-	-	-	-	2	2	2	9	13	28	42	31	47	31	22	10
	ear and respiratory system	F	65	-	-	-	-	-	-	-	-	6	-	8	3	5	9	9	6	8	7	4
D03	Melanoma in situ	M	1843	-	-	-	1	6	7	18	44	47	63	84	105	130	249	259	235	244	196	155
		F	1931	-	-	-	2	3	25	46	61	96	118	134	154	140	244	216	216	178	156	142
D04	Carcinoma in situ of skin	M	3833	-	1	1	-	-	-	2	6	13	33	61	102	170	341	453	590	755	676	629
		F	5551	-	-	-	-	-	-	4	7	21	48	81	117	188	356	491	753	1010	1062	1413
D05	Carcinoma in situ of breast	M	22	-	-	-	-	-	-	-	1	2	1	1	1	3	8	1	2	-	1	1
		F	4816	-	-	-	-	1	2	18	29	91	212	416	942	701	879	761	317	208	147	92
D06	Carcinoma in situ of	F	22132	-	-	-	1	36	1150	9998	4474	2767	1711	1039	401	277	185	50	19	11	9	4
	cervix uteri
D07	Carcinoma in situ of other	M	1146	-	-	-	-	2	6	4	2	8	11	30	52	123	212	282	192	159	42	21
	and unspecified genital	F	800	-	-	-	-	1	16	25	35	84	110	117	96	84	72	49	39	30	27	15
	organs
D09	Carcinoma in situ of other	M	2300	-	-	-	-	-	1	5	9	17	29	42	73	137	257	335	399	414	354	228
	and unspecified sites	F	640	-	-	-	-	-	3	2	7	2	10	6	16	25	64	89	104	109	111	92
D32	Benign neoplasm of meninges	M	347	-	1	-	1	2	3	4	3	7	11	21	32	35	39	39	28	46	35	40
		F	940	-	-	1	2	1	4	8	17	31	61	80	67	79	86	97	84	81	88	153
D33	Benign neoplasm of brain	M	234	1	4	4	8	6	8	7	13	15	25	20	32	18	24	13	14	5	11	6
	and other parts of central	F	272	3	4	1	4	5	8	16	6	20	24	30	25	25	36	23	17	7	9	9
	nervous system
D35.2	Benign neoplasm of	M	283	-	-	-	1	1	4	10	12	11	24	27	13	33	34	42	23	26	13	9
	pituitary gland	F	262	-	1	-	4	7	9	12	17	20	16	25	22	24	25	16	20	18	14	12
D35.3	Benign neoplasm of	M	1	-	-	-	-	-	-	-	-	-	-	-	-	-	-	-	-	-	-	1
	craniopharyngeal duct	F	-	-	-	-	-	-	-	-	-	-	-	-	-	-	-	-	-	-	-	-
D35.4	Benign neoplasm of	M	-	-	-	-	-	-	-	-	-	-	-	-	-	-	-	-	-	-	-	-
	pineal gland	F	-	-	-	-	-	-	-	-	-	-	-	-	-	-	-	-	-	-	-	-
D37	Neoplasm of uncertain or	M	709	2	1	2	9	11	15	16	12	12	12	22	35	36	128	115	85	81	55	60
	unknown behaviour of oral	F	765	1	-	1	10	24	25	19	14	23	35	31	38	42	76	88	83	86	73	96
	cavity and digestive organs
D38	Neoplasm of uncertain or	M	86	-	-	-	-	1	1	1	3	1	3	2	4	3	6	8	14	13	11	15
	unknown behaviour of middle	F	101	-	-	-	-	1	2	4	1	2	4	4	6	7	8	11	14	13	13	11
	ear and respiratory and
	intrathoracic organs
D39	Neoplasm of uncertain or	F	448	-	2	1	4	12	14	28	34	27	44	48	44	34	37	33	25	23	18	20
	unknown behaviour of female
	genital organs
D40	Neoplasm of uncertain or	M	77	-	1	1	1	5	7	7	9	3	3	4	3	5	5	5	5	7	3	3
	unknown behaviour of male
	genital organs
D41	Neoplasm of uncertain or	M	4084	5	-	-	-	4	6	8	16	25	68	104	180	237	498	597	704	668	583	381
	unknown behaviour of	F	1434	1	-	-	1	3	2	4	7	12	18	17	56	104	173	202	223	238	200	173
	urinary organs
D42	Neoplasm of uncertain or	M	68	-	-	-	-	1	-	1	1	1	3	6	9	4	6	9	10	11	4	2
	unknown behaviour of	F	97	-	1	-	-	1	3	1	3	3	6	7	7	11	9	13	11	8	9	4
	meninges
D43	Neoplasm of uncertain or	M	295	3	9	13	10	13	6	5	6	11	14	19	7	8	19	23	30	27	38	34
	unknown behaviour of brain	F	248	2	4	8	10	3	16	10	3	9	10	6	10	8	12	8	14	26	37	52
	and central nervous system
D44	Neoplasm of uncertain or	M	103	-	-	-	4	6	1	3	6	9	13	5	9	8	8	14	7	1	3	6
	unknown behaviour of	F	143	-	3	2	9	6	4	9	12	7	8	6	8	11	11	10	12	8	8	9
	endocrine glands
D45	Polycythaemia vera	M	534	1	-	-	1	1	6	4	7	18	35	42	37	64	82	70	46	52	38	30
		F	306	1	-	-	-	-	-	2	5	3	7	12	16	27	51	26	31	39	45	41
D46	Myelodysplastic syndromes	M	1339	-	-	2	1	3	1	1	2	8	6	15	28	31	82	118	180	276	266	319
		F	977	-	-	1	-	2	1	5	2	4	13	18	24	18	45	69	98	163	179	335
D47	Other neoplasms of uncertain	M	1074	5	1	1	4	3	3	5	15	10	17	35	48	68	109	125	145	182	164	134
	or unknown behaviour of	F	1092	-	1	1	-	5	7	11	11	18	22	47	52	68	94	129	138	158	136	194
	lymphoid, haematopoietic and
	related tissue
D48	Neoplasm of uncertain or	M	520	5	3	7	6	9	16	18	20	15	26	24	21	30	38	36	44	56	70	76
	unknown behaviour of other	F	570	4	4	3	4	18	21	22	29	42	57	54	67	50	42	40	30	20	22	41
	and unspecified sites
1. This table does not include the ICD-10 codes that are non mandatory (see Notes and definitions)
2. There have been some fairly large fluctuations in the number of registrations of C44 across the regions (see Notes and definitions)
3. These figures exclude non-melanoma skin cancer (ICD-10 C44) (see Notes and definitions)
Source: Office for National Statistics
Data of interest (copied from above)
ICD-10 code	Site description			Age group
			All ages	Under 1	1­4	5­9	10­14	15-19	20-24	25-29	30-34	35-39	40-44	45-49	50-54	55-59	60-64	65-69	70-74	75-79	80-84	85 and above
C61	Malignant neoplasm of prostate	M	34892	-	1	-	2	1	1	-	2	6	57	288	970	2393	5067	6756	6821	6094	3654	2779
Data transposed			Correct age groups
	C61
	Malignant neoplasm of prostate
	M
All ages	34892
Under 1	0		Ages	Number of prostate cancer incident cases, 2010 England
1­4	1		0-4	1
5­9	0		5­9	0
10­14	2		10­14	2
15-19	1		15-19	1
20-24	1		20-24	1
25-29	0		25-29	0
30-34	2		30-34	2
35-39	6		35-39	6
40-44	57		40-44	57
45-49	288		45-49	288
50-54	970		50-54	970
55-59	2393		55-59	2393
60-64	5067		60-64	5067
65-69	6756		65-69	6756
70-74	6821		70-74	6821
75-79	6094		75-79	6094
80-84	3654		80-84	3654
85 and above	2779		85+	2779
			SUM	34892

## Sheet: Incidence Engl 2008-2010 ONS+
Prostate cancer incidence in England as a whole, 2008-2010
Based on ONS data
Manipulated data
Adding information from sheets Incidence England 2008 ONS, Incidence England 2009 ONS & Incidence England 2010 ONS
	Incidence
Age	England, 2008-2010
0-4	2
5­9	0
10­14	3
15-19	2
20-24	2
25-29	2
30-34	6
35-39	19
40-44	177
45-49	825
50-54	2753
55-59	7172
60-64	14593
65-69	18756
70-74	19589
75-79	17534
80-84	10753
85+	8190
Total	100378
CHECK	100378

[truncated: 10 more sheets: Incidence All 2008-2010 i PHE, Incidence All 2008-2010 PHE+, P&A Mortality England 2008 ONS+, P&A Mortality England 2009 ONS+, P&A Mortality England 2010 ONS+, P&A Mort Engl 2008-2010 ONS+, Mortality All 2008-2011 i PHE, Mortality All 2008-2010 PHE+, PCa Mort 2008-2010 i PHE, PCa Mort 2008-2010 PHE+]
